# Supplementary material for: Ginger on Human Health: A Comprehensive Systematic Review of 109 Randomized Controlled Trials
Source: Nutrients. 2020 Jan 6;12(1):157. doi: 10.3390/nu12010157 (PMC7019938; doi:10.3390/nu12010157)
Supplement: Supplementary file 1 [file nutrients-12-00157-s001.pdf]

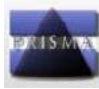

# PRISMA 2009 Checklist

Table S1. PRISMA checklist.

| Section/topic                      | #  | Checklist item                                                                                                                                                                                                                                                                                              | Reported on page # |
|------------------------------------|----|-------------------------------------------------------------------------------------------------------------------------------------------------------------------------------------------------------------------------------------------------------------------------------------------------------------|--------------------|
| <b>TITLE</b>                       |    |                                                                                                                                                                                                                                                                                                             |                    |
| Title                              | 1  | Identify the report as a systematic review, meta-analysis, or both.                                                                                                                                                                                                                                         | 1                  |
| <b>ABSTRACT</b>                    |    |                                                                                                                                                                                                                                                                                                             |                    |
| Structured summary                 | 2  | Provide a structured summary including, as applicable: background; objectives; data sources; study eligibility criteria, participants, and interventions; study appraisal and synthesis methods; results; limitations; conclusions and implications of key findings; systematic review registration number. | 1                  |
| <b>INTRODUCTION</b>                |    |                                                                                                                                                                                                                                                                                                             |                    |
| Rationale                          | 3  | Describe the rationale for the review in the context of what is already known.                                                                                                                                                                                                                              | 1-2                |
| Objectives                         | 4  | Provide an explicit statement of questions being addressed with reference to participants, interventions, comparisons, outcomes, and study design (PICOS).                                                                                                                                                  | 2                  |
| <b>METHODS</b>                     |    |                                                                                                                                                                                                                                                                                                             |                    |
| Protocol and registration          | 5  | Indicate if a review protocol exists, if and where it can be accessed (e.g., Web address), and, if available, provide registration information including registration number.                                                                                                                               | N/A                |
| Eligibility criteria               | 6  | Specify study characteristics (e.g., PICOS, length of follow-up) and report characteristics (e.g., years considered, language, publication status) used as criteria for eligibility, giving rationale.                                                                                                      | 2                  |
| Information sources                | 7  | Describe all information sources (e.g., databases with dates of coverage, contact with study authors to identify additional studies) in the search and date last searched.                                                                                                                                  | 2                  |
| Search                             | 8  | Present full electronic search strategy for at least one database, including any limits used, such that it could be repeated.                                                                                                                                                                               | 2                  |
| Study selection                    | 9  | State the process for selecting studies (i.e., screening, eligibility, included in systematic review, and, if applicable, included in the meta-analysis).                                                                                                                                                   | 2                  |
| Data collection process            | 10 | Describe method of data extraction from reports (e.g., piloted forms, independently, in duplicate) and any processes for obtaining and confirming data from investigators.                                                                                                                                  | 3                  |
| Data items                         | 11 | List and define all variables for which data were sought (e.g., PICOS, funding sources) and any assumptions and simplifications made.                                                                                                                                                                       | 3                  |
| Risk of bias in individual studies | 12 | Describe methods used for assessing risk of bias of individual studies (including specification of whether this was done at the study or outcome level), and how this information is to be used in any data synthesis.                                                                                      | N/A                |
| Summary measures                   | 13 | State the principal summary measures (e.g., risk ratio, difference in means).                                                                                                                                                                                                                               | N/A                |
| Synthesis of results               | 14 | Describe the methods of handling data and combining results of studies, if done, including measures of consistency (e.g., $I^2$ ) for each meta-analysis.                                                                                                                                                   | N/A                |

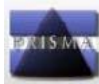

# PRISMA 2009 Checklist

Page 1 of 2

| Section/topic                 | #  | Checklist item                                                                                                                                                                                           | Reported on page # |
|-------------------------------|----|----------------------------------------------------------------------------------------------------------------------------------------------------------------------------------------------------------|--------------------|
| Risk of bias across studies   | 15 | Specify any assessment of risk of bias that may affect the cumulative evidence (e.g., publication bias, selective reporting within studies).                                                             | 3                  |
| Additional analyses           | 16 | Describe methods of additional analyses (e.g., sensitivity or subgroup analyses, meta-regression), if done, indicating which were pre-specified.                                                         | N/A                |
| <b>RESULTS</b>                |    |                                                                                                                                                                                                          |                    |
| Study selection               | 17 | Give numbers of studies screened, assessed for eligibility, and included in the review, with reasons for exclusions at each stage, ideally with a flow diagram.                                          | 3                  |
| Study characteristics         | 18 | For each study, present characteristics for which data were extracted (e.g., study size, PICOS, follow-up period) and provide the citations.                                                             | 4-13               |
| Risk of bias within studies   | 19 | Present data on risk of bias of each study and, if available, any outcome level assessment (see item 12).                                                                                                | N/A                |
| Results of individual studies | 20 | For all outcomes considered (benefits or harms), present, for each study: (a) simple summary data for each intervention group (b) effect estimates and confidence intervals, ideally with a forest plot. | 14-22              |
| Synthesis of results          | 21 | Present results of each meta-analysis done, including confidence intervals and measures of consistency.                                                                                                  | N/A                |
| Risk of bias across studies   | 22 | Present results of any assessment of risk of bias across studies (see Item 15).                                                                                                                          | 22-23              |
| Additional analysis           | 23 | Give results of additional analyses, if done (e.g., sensitivity or subgroup analyses, meta-regression [see Item 16]).                                                                                    | N/A                |
| <b>DISCUSSION</b>             |    |                                                                                                                                                                                                          |                    |
| Summary of evidence           | 24 | Summarize the main findings including the strength of evidence for each main outcome; consider their relevance to key groups (e.g., healthcare providers, users, and policy makers).                     | 23-25              |
| Limitations                   | 25 | Discuss limitations at study and outcome level (e.g., risk of bias), and at review-level (e.g., incomplete retrieval of identified research, reporting bias).                                            | 23-25              |
| Conclusions                   | 26 | Provide a general interpretation of the results in the context of other evidence, and implications for future research.                                                                                  | 25-26              |
| <b>FUNDING</b>                |    |                                                                                                                                                                                                          |                    |
| Funding                       | 27 | Describe sources of funding for the systematic review and other support (e.g., supply of data); role of funders for the systematic review.                                                               | 26                 |

From: Moher D, Liberati A, Tetzlaff J, Altman DG, The PRISMA Group (2009). Preferred Reporting Items for Systematic Reviews and Meta-Analyses: The PRISMA Statement. PLoS Med 6(7): e1000097. doi:10.1371/journal.pmed1000097

For more information, visit: [www.prisma-statement.org](http://www.prisma-statement.org).

Page 2 of 2

**Table S2.** Study design and demographic description of the included studies with a quality score less than 10.

| Author<br>(year)                     | Cohort<br>allocation | Study design                                   | Type of<br>disease/symptom                      | Intervention |       |                                                                                   | Comparator |       |                                                               | Duration                                                                                                                                        | Blind            |
|--------------------------------------|----------------------|------------------------------------------------|-------------------------------------------------|--------------|-------|-----------------------------------------------------------------------------------|------------|-------|---------------------------------------------------------------|-------------------------------------------------------------------------------------------------------------------------------------------------|------------------|
|                                      |                      |                                                |                                                 | Number       | M/F   | Dosage                                                                            | Number     | M/F   | Dosage                                                        |                                                                                                                                                 |                  |
| Bossi <i>et al.</i><br>(2017) [1]    | Italy                | Randomized<br>controlled<br>trial              | Chemotherapy-<br>induced nausea<br>and vomiting | 121          | 83/38 | 40 mg of ginger<br>extract/cap, 4<br>capsules/day, bid                            | 123        | 77/46 | 4 placebo<br>capsules/day, bid                                | 42 to 56 days                                                                                                                                   | Double-<br>blind |
| Konmun <i>et al.</i> (2017) [2]      | Thailand             | Randomized<br>controlled<br>trial              | Chemotherapy-<br>induced nausea<br>and vomiting | 40           | 4/36  | 5 mg of 6-gingerol<br>(1.4% w/w of ginger<br>extract)/cap, 4<br>capsules/day, bid | 41         | 2/39  | Capsule containing<br>diluents/binder, 4<br>capsules/day, bid | 12 weeks                                                                                                                                        | Double-<br>blind |
| Zeraati <i>et al.</i><br>(2016) [3]  | Iran                 | Randomized<br>controlled<br>trial              | Postoperative<br>nausea and<br>vomiting         | 46           | 0/46  | 25 drops of ginger<br>extract in 30 mL of<br>water                                | 46         | 0/46  | 30 mL of water                                                | 1 h before<br>surgery                                                                                                                           | Double-<br>blind |
| Rad <i>et al.</i><br>(2018) [4]      | Iran                 | Crossover<br>randomized<br>controlled<br>trial | Primary<br>dysmenorrhea                         | 168          | 0/168 | 200 mg of powdered<br>ginger/cap, 4<br>capsules/day                               | 168        | 0/168 | 800 mg of<br>ibuprofen/cap, 4<br>capsules/day                 | Two<br>consecutive<br>cycles (at the<br>onset of pain)<br>8 weeks (at the<br>onset of<br>menstruation<br>and every 6 h<br>until pain<br>relief) | Double-<br>blind |
| Shirvani <i>et al.</i><br>(2017) [5] | Iran                 | Randomized<br>controlled<br>trial              | Primary<br>dysmenorrhea                         | 61           | 0/61  | 250 mg of powdered<br>ginger capsule                                              | 61         | 0/61  | Exercise                                                      | Single-dose (24<br>h before the C-<br>section)                                                                                                  | Open-<br>label   |
| Mashak <i>et al.</i><br>(2018) [6]   | Iran                 | Randomized<br>controlled<br>trial              | Post-spinal<br>puncture<br>headache             | 80           | 0/80  | 250 mg of powdered<br>ginger/cap, 3<br>capsules/dose                              | 80         | 0/80  | No intervention                                               | N/A                                                                                                                                             | Open-<br>label   |
| Hashemi <i>et al.</i><br>(2019) [7]  | Iran                 | Randomized<br>controlled<br>trial              | Low back pain                                   | 40           | N/A   | Dose N/A (Ginger)                                                                 | 40         | N/A   | Dose N/A (Control)                                            | N/A                                                                                                                                             | Single-<br>blind |
|                                      | Iran                 | Randomized<br>controlled<br>trial              | Low back pain                                   | 40           | N/A   | Dose N/A (Ginger)                                                                 | 40         | N/A   | Dose N/A (vitamin<br>D)                                       | N/A                                                                                                                                             | Single-<br>blind |

|                                          |      |                                   |                                                                                                            |    |       |                                                             |    |       |                                                      |                                              |                  |
|------------------------------------------|------|-----------------------------------|------------------------------------------------------------------------------------------------------------|----|-------|-------------------------------------------------------------|----|-------|------------------------------------------------------|----------------------------------------------|------------------|
| Hasanvand<br><i>et al.</i><br>(2018) [8] | Iran | Randomized<br>controlled<br>trial | Chest pain by<br>percutaneous<br>transluminal<br>coronary<br>angioplasty                                   | 17 | 9/8   | 250 mg of powdered<br>ginger/cap, 1<br>capsule/day          | 17 | 13/4  | 250 mg of<br>starch/cap, 1<br>capsule/day            | 7 days from 10<br>days before<br>angioplasty | Double-<br>blind |
| Azimi <i>et al.</i><br>(2016) [9]        | Iran | Randomized<br>controlled<br>trial | Type 2 diabetes<br>mellitus                                                                                | 41 | 15/26 | 3 g of powdered<br>ginger + black tea,<br>three times a day | 40 | 16/24 | 3 g of cinnamon +<br>black tea, three<br>times a day | 8 weeks                                      | Single-<br>blind |
|                                          | Iran | Randomized<br>controlled<br>trial | Type 2 diabetes<br>mellitus                                                                                | 41 | 15/26 | 3 g of powdered<br>ginger + black tea,<br>three times a day | 42 | 17/25 | 3 g of cardamom +<br>black tea, three<br>times a day | 8 weeks                                      | Single-<br>blind |
|                                          | Iran | Randomized<br>controlled<br>trial | Type 2 diabetes<br>mellitus                                                                                | 41 | 15/26 | 3 g of powdered<br>ginger + black tea,<br>three times a day | 42 | 16/26 | 1 g of saffron + black<br>tea, three times a<br>day  | 8 weeks                                      | Single-<br>blind |
|                                          | Iran | Randomized<br>controlled<br>trial | Type 2 diabetes<br>mellitus                                                                                | 41 | 15/26 | 3 g of powdered<br>ginger + black tea,<br>three times a day | 39 | 15/24 | Black tea, three<br>times a day                      | 8 weeks                                      | Single-<br>blind |
| Shidfar <i>et al.</i><br>(2015) [10]     | Iran | Randomized<br>controlled<br>trial | Type 2 diabetes<br>mellitus                                                                                | 22 | N/A   | 1 g of powdered<br>ginger/cap, 3<br>capsules/day            | 23 | N/A   | 1 g of lactose/cap, 3<br>capsules/day                | 3 months                                     | Double-<br>blind |
| Tabibi <i>et al.</i><br>(2015) [11]      | Iran | Randomized<br>controlled<br>trial | Serum lipids and<br>lipoproteins levels<br>in peritoneal<br>dialysis patients<br>Metabolic<br>syndrome and | 18 | 11/7  | 250 mg of ginger/cap,<br>4 capsules/day                     | 18 | 10/8  | 250 mg of<br>starch/cap, 4<br>capsules/day           | 10 weeks                                     | Double-<br>blind |
| Karimi <i>et al.</i><br>(2015) [12]      | Iran | Randomized<br>controlled<br>trial | pro-inflammatory<br>markers of obese<br>women who have<br>diagnosed with<br>breast neoplasms               | 10 | 0/10  | 750 mg of powdered<br>ginger/cap, 4<br>capsules/day         | 10 | 0/10  | 1 g of starch/cap, 4<br>capsules/day                 | 7 days a week<br>and for 6<br>weeks.         | N/A              |
|                                          | Iran | Randomized<br>controlled<br>trial | Metabolic<br>syndrome and<br>pro-inflammatory                                                              | 10 | 0/10  | 750 mg of powdered<br>ginger/cap, 4                         | 10 | 0/10  | Exercise                                             | 6 weeks and 4<br>sessions at a<br>week       | N/A              |

|                                           |          |                                       |                                                                                                                                             |    |      |                                                                  |    |       |                                              |                                                                 |              |
|-------------------------------------------|----------|---------------------------------------|---------------------------------------------------------------------------------------------------------------------------------------------|----|------|------------------------------------------------------------------|----|-------|----------------------------------------------|-----------------------------------------------------------------|--------------|
|                                           |          |                                       | markers of obese women who have diagnosed with breast neoplasms                                                                             |    |      | capsules/day + exercise                                          |    |       |                                              |                                                                 |              |
| Emrani <i>et al.</i> (2016) [13]          | Iran     | Randomized controlled trial           | Antituberculosis-induced gastrointestinal adverse reactions                                                                                 | 30 | 22/8 | 250 mg of powdered ginger/cap, 2 capsules/day                    | 30 | 25/5  | 2 placebo capsules/day                       | 4 weeks (at 30 min before morning antituberculosis medications) | Double-blind |
| Kulkarni <i>et al.</i> (2016) [14]        | India    | Randomized controlled trial           | Anti-inflammatory and antioxidant effect in tuberculosis                                                                                    | 34 | N/A  | 250 mg of ginger extract/cap (1.5 g pure powder), 2 capsules/day | 35 | N/A   | 250mg of starch/cap, 2 capsules/day          | 1 month                                                         | N/A          |
| Miyamoto <i>et al.</i> (2015) [15]        | Japan    | Crossover randomized controlled trial | Thermoregulatory function and fat oxidation: thermal balance, T <sub>cor</sub> <sup>1</sup> , and blood energy substrates levels            | 5  | 5/0  | 250 mg of dried ginger root powder/cap, 4 capsules/dose          | 5  | 5/0   | 250 mg of starch/cap, 4 capsules/dose        | Single dose                                                     | N/A          |
|                                           | Japan    | Crossover randomized controlled trial | Thermoregulatory function and fat oxidation: threshold T <sub>cor</sub> <sup>1</sup> for skBF <sup>2</sup> and m <sub>sw</sub> <sup>3</sup> | 4  | 4/0  | 250 mg of dried ginger root powder/cap, 4 capsules/dose          | 4  | 4/0   | 250 mg of starch/cap, 4 capsules/dose        | Single dose                                                     | N/A          |
| Manusirivithaya <i>et al.</i> (2004) [16] | Thailand | Crossover randomized controlled trial | Chemotherapy-induced nausea and vomiting                                                                                                    | 43 | N/A  | 1 g of powdered ginger root/day                                  | 43 | N/A   | Placebo (acute) and metoclopramide (delayed) | 5 days per chemotherapy cycle <sup>4</sup>                      | Double-blind |
| Pillai <i>et al.</i> (2011) [17]          | India    | Randomized controlled trial           | Chemotherapy-induced nausea and vomiting                                                                                                    | 27 | N/A  | 1000 mg or 2000 mg of powdered ginger/day <sup>5</sup>           | 30 | 16/14 | 1000 mg and 2000 mg of starch powder/day     | Day 1 to day 3 of chemotherapy cycle                            | Double-blind |

|                                                |        |                                                 |                                                 |    |       |                                                                                                                                                               |    |       |                                                                                                                                            |                                                          |                  |
|------------------------------------------------|--------|-------------------------------------------------|-------------------------------------------------|----|-------|---------------------------------------------------------------------------------------------------------------------------------------------------------------|----|-------|--------------------------------------------------------------------------------------------------------------------------------------------|----------------------------------------------------------|------------------|
| Panahi <i>et al.</i><br>(2012) [18]            | Iran   | Randomized<br>open-label<br>controlled<br>trial | Chemotherapy-<br>induced nausea<br>and vomiting | 37 | 0/37  | 500 mg of powdered<br>ginger and standard<br>antiemetic regimen <sup>6</sup>                                                                                  | 41 | 0/41  | Standard antiemetic<br>regimen                                                                                                             | 4 days from<br>initiation of<br>chemotherapy             | Open-<br>label   |
| Sontakke <i>et al.</i><br>(2002) [19]          | India  | Crossover<br>randomized<br>controlled<br>trial  | Chemotherapy-<br>induced nausea<br>and vomiting | 50 | 11/39 | 500 mg of powdered<br>ginger/cap, 2 ginger<br>capsules + 2 mL of<br>normal saline (i.v.) 20<br>min before<br>chemotherapy + 2<br>ginger capsules after<br>6 h | 50 | 11/39 | 2 lactulose capsules<br>+ metoclopramide<br>20 mg (i.v.) 20 min<br>before<br>chemotherapy + 2<br>capsules of 5 mg of<br>metoclopramide/cap | 3 cycle (21<br>days of<br>interval<br>between<br>cycles) | Double-<br>blind |
|                                                | India  | Crossover<br>randomized<br>controlled<br>trial  | Chemotherapy-<br>induced nausea<br>and vomiting | 50 | 11/39 | 500 mg of powdered<br>ginger/cap, 2 ginger<br>capsules + 2 mL of<br>normal saline (i.v.) 20<br>min before<br>chemotherapy + 2<br>ginger capsules after<br>6 h | 50 | 11/39 | 2 lactulose capsules<br>+ ondansetron 4 mg<br>(i.v.) 20 min before<br>chemotherapy + 2<br>capsules of 2 mg of<br>ondansetron/cap           | 3 cycle (21<br>days of<br>interval<br>between<br>cycles) | Double-<br>blind |
| Arslan <i>et al.</i><br>(2014) [20]            | Turkey | Randomized<br>controlled<br>trial               | Chemotherapy-<br>induced nausea<br>and vomiting | 30 | 30/0  | 500 mg of powdered<br>ginger mixed in<br>yogurt, twice/day                                                                                                    | 30 | 30/0  | No intervention                                                                                                                            | 3 days                                                   | Open<br>label    |
| Mohammad<br>beigi <i>et al.</i><br>(2011) [21] | Iraq   | Randomized<br>controlled<br>trial               | Nausea and<br>vomiting of<br>pregnancy          | 34 | 0/34  | 200 mg of ginger<br>essence/cap, 3<br>capsules/day                                                                                                            | 34 | 0/34  | 10 mg of<br>metoclopramide/cap<br>, 3 capsules/day                                                                                         | 5 days                                                   | Double-<br>blind |
|                                                | Iraq   | Randomized<br>controlled<br>trial               | Nausea and<br>vomiting of<br>pregnancy          | 34 | 0/34  | 200 mg of ginger<br>essence/cap, 3<br>capsules/day                                                                                                            | 34 | 0/34  | 200 mg of flour/cap,<br>3 capsules/day                                                                                                     | 5 days                                                   | Double-<br>blind |
| Ozgoli <i>et al.</i><br>(2009) [22]            | Iran   | Randomized<br>controlled<br>trial               | Nausea and<br>vomiting of<br>pregnancy          | 32 | 0/32  | 250 mg of powdered<br>ginger root/cap, 4<br>capsules/day                                                                                                      | 35 | 0/35  | 250 mg of<br>lactose/cap, 4<br>capsules/day                                                                                                | 4 days                                                   | Single-<br>blind |

|                                           |               |                             |                                   |                      |       |                                                                                                       |                       |       |                                                                                              |                                                                 |              |
|-------------------------------------------|---------------|-----------------------------|-----------------------------------|----------------------|-------|-------------------------------------------------------------------------------------------------------|-----------------------|-------|----------------------------------------------------------------------------------------------|-----------------------------------------------------------------|--------------|
| Keating <i>et al.</i><br>(2002) [23]      | United States | Randomized controlled trial | Nausea and vomiting of pregnancy  | 13                   | 0/13  | 1 tablespoon of commercially prepared study syrup (250 mg of ginger with honey, water), 4 times daily | 11                    | 0/11  | 1 tablespoon of commercially prepared placebo syrup (honey, lemon oil, water), 4 times daily | 2 weeks                                                         | Double-blind |
| Pongrojpraw <i>et al.</i><br>(2007) [24]  | Thailand      | Randomized controlled trial | Nausea and vomiting of pregnancy  | 85                   | 0/85  | 500 mg of powdered ginger/cap, 2 capsules/day, bid                                                    | 85                    | 0/85  | 50 mg of dimenhydrinate/cap, 2 capsules/day, bid                                             | 1 week                                                          | Double-blind |
| Saberi <i>et al.</i><br>(2013) [25]       | Iran          | Randomized controlled trial | Nausea and vomiting of pregnancy  | 37                   | 0/37  | 250 mg of powdered ginger/cap, 3 capsules/day                                                         | 36                    | 0/36  | 3 lactose capsules/day (Placebo)                                                             | 4 days                                                          | N/A          |
|                                           | Iran          | Randomized controlled trial | Nausea and vomiting of pregnancy  | 37                   | 0/37  | 250 mg of powdered ginger/cap, 3 capsules/day                                                         | 33                    | 0/33  | No intervention (Control)                                                                    | 4 days                                                          | N/A          |
| Javadi <i>et al.</i><br>(2013) [26]       | Iran          | Randomized controlled trial | Nausea and vomiting of pregnancy  | 47                   | 0/47  | 250 mg of powdered ginger/cap, 4 capsules/day                                                         | 48                    | 0/48  | 40 mg of vitamin B6/tab, 2 tablets/day                                                       | 4 days                                                          | N/A          |
| Apariman <i>et al.</i><br>(2006) [27]     | Thailand      | Randomized controlled trial | Postoperative nausea and vomiting | 30                   | N/A   | 500 mg of powdered ginger/cap, 3 capsules/day                                                         | 30                    | N/A   | 3 capsules of placebo/day                                                                    | 1 h prior to the operation                                      | N/A          |
| Nanthakom on <i>et al.</i><br>(2006) [28] | Thailand      | Randomized controlled trial | Postoperative nausea and vomiting | 60                   | N/A   | 500 mg of powdered ginger/cap, 2 capsules/dose                                                        | 60                    | N/A   | 500 mg of lactose/cap, 2 capsules/dose                                                       | Single-dose (one hour before the surgery)                       | Double-blind |
| Kalava <i>et al.</i><br>(2013) [29]       | United States | Randomized controlled trial | Postoperative nausea and vomiting | 116                  | 0/116 | 1 g of powdered ginger/cap, 1 capsule/dose                                                            | 123                   | 0/123 | 1 g of placebo/cap, 1 capsule/dose                                                           | 30 min before induction of anesthesia and 2 hours after surgery | Double-blind |
| Visalyaputra <i>et al.</i><br>(1997) [30] | Thailand      | Randomized controlled trial | Postoperative nausea and vomiting | Group 3 (ginger): 27 | 0/27  | 500 mg of ginger root/cap, 2 capsules/dose + 0.5                                                      | Group 1 (placebo): 28 | 0/28  | 500 mg of dried rice starch/cap, 2 capsules/dose + 0.5                                       | 1 h before induction of anesthesia and                          | Triple-blind |

|                                          |                   |                                   |                                                   |                                                |       |                                                                                                                                                      |                                 |       |                                                                                                                                                      |                                                                                                                               |                  |
|------------------------------------------|-------------------|-----------------------------------|---------------------------------------------------|------------------------------------------------|-------|------------------------------------------------------------------------------------------------------------------------------------------------------|---------------------------------|-------|------------------------------------------------------------------------------------------------------------------------------------------------------|-------------------------------------------------------------------------------------------------------------------------------|------------------|
|                                          |                   |                                   |                                                   |                                                |       | mL of normal saline<br>(i.v.)<br>500 mg of ginger<br>root/cap, 2<br>capsules/dose + 1.25<br>mg of droperidol in<br>0.5 mL of normal<br>saline (i.v.) |                                 |       | mL of normal saline<br>(i.v.)<br>500 mg of rice<br>starch/cap, 2<br>capsules/dose + 1.25<br>mg of droperidol in<br>0.5 mL of normal<br>saline (i.v.) | 30 min before<br>discharge<br><br>1 h before<br>induction of<br>anesthesia and<br>30 min before<br>discharge                  |                  |
|                                          | Thailand          | Randomized<br>controlled<br>trial | Postoperative<br>nausea and<br>vomiting           | Group 4<br>(droperi<br>dol +<br>ginger):<br>27 | 0/27  |                                                                                                                                                      | Group 2<br>(droperid<br>ol): 29 | 0/29  |                                                                                                                                                      |                                                                                                                               | Triple-<br>blind |
| Phillips <i>et al.</i><br>(1993) [31]    | United<br>Kingdom | Randomized<br>controlled<br>trial | Postoperative<br>nausea and<br>vomiting           | 40                                             | 0/40  | 1 g of powdered<br>ginger root in 2<br>capsules                                                                                                      | 40                              | 0/40  | 5 mg of<br>metoclopramide/cap<br>, 2 capsules/dose                                                                                                   | Single-dose                                                                                                                   | Double-<br>blind |
|                                          | United<br>Kingdom | Randomized<br>controlled<br>trial | Postoperative<br>nausea and<br>vomiting           | 40                                             | 0/40  | 1 g of powdered<br>ginger root in 2<br>capsules                                                                                                      | 40                              | 0/40  | 1 g of lactose in 2<br>capsules                                                                                                                      | Single-dose                                                                                                                   | Double-<br>blind |
| Bone <i>et al.</i><br>(1990) [32]        | United<br>Kingdom | Randomized<br>controlled<br>trial | Postoperative<br>nausea and<br>vomiting           | 20                                             | 0/20  | 500 mg of powdered<br>ginger root/cap and<br>injection of 2 mL of<br>sterile water                                                                   | 20                              | 0/20  | 500 mg of<br>lactulose/cap and<br>injection of 2 mL of<br>sterile water                                                                              | Single-dose                                                                                                                   | Double-<br>blind |
|                                          | United<br>Kingdom | Randomized<br>controlled<br>trial | Postoperative<br>nausea and<br>vomiting           | 20                                             | 0/20  | 500 mg of powdered<br>ginger root/cap and<br>injection of 2 mL of<br>sterile water                                                                   | 20                              | 0/20  | 500 mg of<br>lactulose/cap and<br>injection of 10 mg of<br>metoclopramide                                                                            | Single-dose                                                                                                                   | Double-<br>blind |
| Tavlan <i>et al.</i><br>(2006) [33]      | Turkey            | Randomized<br>controlled<br>trial | Postoperative<br>nausea and<br>vomiting           | 60                                             | 6/54  | Dexamethasone 150<br>$\mu$ g/kg (i.v.) + 0.5 g of<br>ginger + 10 mg of oral<br>diazepam                                                              | 60                              | 8/52  | Dexamethasone 150<br>$\mu$ g/kg (i.v.) +<br>placebo + 10 mg of<br>oral diazepam                                                                      | Dexamethason<br>e: before the<br>induction of<br>anesthesia<br>Ginger,<br>placebo and<br>diazepam: 1 h<br>prior to<br>surgery | Double-<br>blind |
| Dabaghzadeh <i>et al.</i><br>(2014) [34] | Iran              | Randomized<br>controlled<br>trial | Antiretroviral-<br>induced nausea<br>and vomiting | 51                                             | 36/15 | 250 mg of powdered<br>ginger/cap, 4<br>capsules/day, bid                                                                                             | 51                              | 34/17 | 250 mg of<br>starch/cap, 4<br>capsules/day, bid                                                                                                      | 14 days                                                                                                                       | Double-<br>blind |

|                                    |               |                                       |                       |                                        |                                              |                                                                                                               |                                          |                                              |                                                                                               |                                                                                   |              |
|------------------------------------|---------------|---------------------------------------|-----------------------|----------------------------------------|----------------------------------------------|---------------------------------------------------------------------------------------------------------------|------------------------------------------|----------------------------------------------|-----------------------------------------------------------------------------------------------|-----------------------------------------------------------------------------------|--------------|
| Holtmann <i>et al.</i> (1989) [35] | Germany       | Randomized controlled trial           | Emesis                | 38                                     | 18/20                                        | One capsule containing 1000 mg of powdered ginger root                                                        | 38                                       | 18/20                                        | One capsule containing 100 mg of dimenhydrinate                                               | N/A                                                                               | Double-blind |
|                                    | Germany       | Randomized controlled trial           | Emesis                | 38                                     | 18/20                                        | One capsule containing 1000 mg of powdered ginger root                                                        | 38                                       | 18/20                                        | One capsule containing lactose                                                                | N/A                                                                               | Double-blind |
| Grontved <i>et al.</i> (1988) [36] | Denmark       | Randomized controlled trial           | Seasickness           | 40                                     | N/A                                          | 1 g of powdered ginger root                                                                                   | 39                                       | N/A                                          | 1 g of lactose                                                                                | Single-dose                                                                       | Double-blind |
| Grontved <i>et al.</i> (1985) [37] | Denmark       | Crossover randomized controlled trial | Vertigo and nystagmus | 8                                      | N/A                                          | 1 g of powdered ginger root/cap, 1 capsule/dose                                                               | 8                                        | N/A                                          | 1 g of lactose/cap, 1 capsule/dose                                                            | Single-dose                                                                       | Double-blind |
| Mowrey <i>et al.</i> (1982) [38]   | United States | Randomized controlled trial           | Motion sickness       | 12                                     | 6/6                                          | 2 capsules of 940 mg of powdered ginger                                                                       | Group 1: 12<br>Group 2: 12               | Group 1: 6/6<br>Group 2: 6/6                 | Group 1: 100 mg of dimenhydrinate<br>Group 2: 2 capsules of powdered chickweed herb (placebo) | Single-dose                                                                       | N/A          |
| Stewart <i>et al.</i> (1990) [39]  | United States | Randomized controlled trial           | Motion sickness       | Group 1: 8<br>Group 2: 8<br>Group 3: 8 | Group 1: 8/0<br>Group 2: 8/0<br>Group 3: 8/0 | Group 1: 500 mg of powdered ginger<br>Group 2: 1000 mg of powdered ginger<br>Group 3: 1000 mg of fresh ginger | Scopolamine group: 8<br>Control group: 8 | Scopolamine group: 8/0<br>Control group: 8/0 | Scopolamine group: 0.6 mg of scopolamine<br>Control group: lactose                            | 1 h before the test (ginger and lactose) and 30 min before the test (scopolamine) | N/A          |
| Jenabi <i>et al.</i> (2013) [40]   | Iran          | Randomized controlled trial           | Primary dysmenorrhea  | 35                                     | 0/35                                         | 500 mg of powdered ginger/cap, 3 capsules/day                                                                 | 34                                       | 0/34                                         | 3 capsules of placebo/day                                                                     | First menstruation cycles for 3 days                                              | N/A          |
| Shirvani <i>et al.</i> (2014) [41] | Finland       | Randomized controlled trial           | Primary dysmenorrhea  | 61                                     | 0/61                                         | 250 mg of powdered ginger/cap, 4 capsules/day                                                                 | 61                                       | 0/61                                         | 250 mg of mefenamic acid/cap, 3 capsules/day                                                  | 2 cycles of menstruation (from the onset                                          | N/A          |

|                                                     |                  |                                                |                                                                                |    |       |                                                                                                             |                             |                                    |                                                                                                                                                                              | of<br>menstruation<br>until pain<br>relief) |                  |
|-----------------------------------------------------|------------------|------------------------------------------------|--------------------------------------------------------------------------------|----|-------|-------------------------------------------------------------------------------------------------------------|-----------------------------|------------------------------------|------------------------------------------------------------------------------------------------------------------------------------------------------------------------------|---------------------------------------------|------------------|
| Black <i>et al.</i><br>(2008) [42]                  | United<br>States | Crossover<br>randomized<br>controlled<br>trial | Quadriceps<br>muscle pain<br>during moderate-<br>intensity cycling<br>exercise | 25 | 10/15 | Six capsules<br>containing 2 g of<br>ground ginger with<br>250 mL of water and 1<br>tablespoon of olive oil | 25                          | 10/15                              | Six capsules<br>containing 2 g of<br>placebo with 250<br>mL of water and 1<br>tablespoon of olive<br>oil                                                                     | Single-dose                                 | Double-<br>blind |
| Maghbooli <i>et al.</i> (2014)<br>[43]              | Iran             | Randomized<br>controlled<br>trial              | Migraine                                                                       | 50 | 13/37 | 250 mg of powdered<br>ginger rhizome/cap, 1<br>capsule/onset of<br>migraine                                 | 50                          | 16/34                              | 50 mg powder of<br>sumatriptan/cap, 1<br>capsule/onset of<br>migraine                                                                                                        | Single-dose                                 | Double-<br>blind |
| Arablou <i>et al.</i> (2013)<br>[44]                | Iran             | Randomized<br>controlled<br>trial              | Type 2 diabetes<br>mellitus                                                    | 33 | 25/8  | 800 mg of powdered<br>ginger rhizome/cap, 2<br>capsules/day                                                 | 30                          | 23/7                               | 800 mg of wheat<br>flour/cap, 2<br>capsules/day                                                                                                                              | 12 weeks                                    | Double-<br>blind |
| Mozaffari-<br>Khosravi <i>et al.</i> (2014)<br>[45] | Iran             | Randomized<br>controlled<br>trial              | Type 2 diabetes<br>mellitus                                                    | 41 | 18/23 | 1 g of powdered<br>ginger/cap, 3<br>capsules/day                                                            | 40                          | 13/27                              | 1 g of cellulose<br>microcrystalline/cap<br>, 3 capsules/day                                                                                                                 | 8 weeks                                     | Double-<br>blind |
| Andallu <i>et al.</i> (2001)<br>[46]                | India            | Randomized<br>controlled<br>trial              | Type 2 diabetes<br>mellitus                                                    | 8  | 8/0   | 500 mg of powdered<br>ginger/cap, 2<br>capsules/day                                                         | 8                           | 8/0                                | N/A (Control<br>group)                                                                                                                                                       | 30 days                                     | N/A              |
|                                                     | India            | Randomized<br>controlled<br>trial              | Hyperglycemia<br>and<br>hyperlipidemia                                         | 8  | 8/0   | 500 mg of powdered<br>ginger/cap, 2<br>capsules/day                                                         | Group 1: 8<br>Group 2:<br>8 | Group 1:<br>8/0<br>Group 2:<br>8/0 | Group 1: 500 mg of<br>Ashwagandha/cap,<br>2 capsules/day<br>Group 2:<br>500 mg of<br>Mulberry/cap, 2<br>capsules/day<br>1 g of starch<br>powder/cap, 12<br>capsules/day, qid | 30 days                                     | N/A              |
| Karimi <i>et al.</i><br>(2013) [47]                 | Iran             | Randomized<br>controlled<br>trial              | Obesity with<br>breast cancer                                                  | 10 | 0/10  | 750 mg of powdered<br>ginger rhizome/cap,<br>12 capsules/day, qid                                           | 10                          | 0/10                               |                                                                                                                                                                              | 6 weeks                                     | Double-<br>blind |

|                                           |        |                             |                                                                                                                                                                                                             |     |       |                                                                                            |     |       |                                                                               |                                              |              |
|-------------------------------------------|--------|-----------------------------|-------------------------------------------------------------------------------------------------------------------------------------------------------------------------------------------------------------|-----|-------|--------------------------------------------------------------------------------------------|-----|-------|-------------------------------------------------------------------------------|----------------------------------------------|--------------|
|                                           | Iran   | Randomized controlled trial | Obesity with breast cancer                                                                                                                                                                                  | 10  | 0/10  | 750 mg of powdered ginger rhizome/cap, 12 capsules/day, qid + Water-based exercise program | 10  | 0/10  | 1 g of starch powder/cap, 12 capsules/day, qid + Water-based exercise program | 6 weeks                                      | Double-blind |
| Atashak <i>et al.</i> (2011) [48]         | Iran   | Randomized controlled trial | Obesity-related cardiovascular risk                                                                                                                                                                         | 8   | 8/0   | 250 mg of powdered ginger/cap, 4 capsules/day                                              | 8   | 8/0   | 250 mg of maltodextrin/cap, 4 capsules/day                                    | 10 weeks                                     | Double-blind |
|                                           | Iran   | Randomized controlled trial | Obesity-related cardiovascular risk                                                                                                                                                                         | 8   | 8/0   | 250 mg of powdered ginger/cap, 4 capsules/day with resistance training                     | 8   | 8/0   | 250 mg of maltodextrin/cap, 4 capsules/day with resistance training           | 10 weeks                                     | Double-blind |
| Alizadeh-Navaei <i>et al.</i> (2008) [49] | Iran   | Randomized controlled trial | Hyperlipidemia                                                                                                                                                                                              | 45  | 16/29 | 500 mg of powdered ginger rhizome/cap, 6 capsules/day, tid                                 | 40  | 18/22 | 500 mg of lactose/cap, 6 capsules/day, tid                                    | 45 days                                      | Double-blind |
|                                           | Iran   | Randomized controlled trial | Metabolic syndrome and pro-inflammatory markers of obese women who have diagnosed with breast neoplasms<br>Serum glucose, advanced glycation end products, and inflammation in peritoneal dialysis patients | 10  | 0/10  | 750 mg of powdered ginger/cap, 4 capsules/day + exercise                                   | 10  | 0/10  | Exercise                                                                      | 6 weeks and 4 sessions at a week             | N/A          |
| Imani <i>et al.</i> (2014) [50]           | Iran   | Randomized controlled trial | glycation end products, and inflammation in peritoneal dialysis patients                                                                                                                                    | 18  | 11/7  | 250 mg of ginger/cap, 4 capsules/day                                                       | 18  | 10/8  | 250 mg of starch/cap, 4 capsules/day                                          | 10 weeks                                     | Double-blind |
| Hu <i>et al.</i> (2011) [51]              | Taiwan | Randomized controlled trial | Functional dyspepsia                                                                                                                                                                                        | N/A | N/A   | 400 mg of powdered ginger root/cap, 3 capsules/day                                         | N/A | N/A   | Placebo (starch)                                                              | Two afternoons, separated by at least 7 days | Double-blind |

|                                            |                  |                                                |                                                                                                                                                            |                                             |      |                                                                                                                                       |                                          |      |                                                                                                        |                                                                                                |                                          |
|--------------------------------------------|------------------|------------------------------------------------|------------------------------------------------------------------------------------------------------------------------------------------------------------|---------------------------------------------|------|---------------------------------------------------------------------------------------------------------------------------------------|------------------------------------------|------|--------------------------------------------------------------------------------------------------------|------------------------------------------------------------------------------------------------|------------------------------------------|
| Wu <i>et al.</i><br>(2007) [52]            | Taiwan           | Randomized<br>controlled<br>trial              | Gastric emptying<br>and motility in<br>healthy human                                                                                                       | 12                                          | 12/0 | 400 mg of powdered<br>ginger root/cap, 3<br>capsules/day                                                                              | 12                                       | 12/0 | 400 mg of<br>starch/cap, 3<br>capsules/day                                                             | Two<br>afternoons,<br>separated by<br>at least 7 days                                          | Double-<br>blind                         |
| Lien <i>et al.</i><br>(2002) [53]          | United<br>States | Crossover<br>randomized<br>controlled<br>trial | Motion sickness<br>and gastric slow-<br>wave<br>dysrhythmias<br>induced by<br>circularvection                                                              | 13                                          | N/A  | 1 or 2 g of ginger in<br>capsules                                                                                                     | 13                                       | N/A  | Placebo (starch) in<br>capsules                                                                        | Single-dose at<br>1 hour before<br>circularvection                                             | Double-<br>blind                         |
|                                            | United<br>States | Crossover<br>randomized<br>controlled<br>trial | Vasopressin-<br>evoked gastric<br>dysrhythmias and<br>nausea                                                                                               | 4                                           | N/A  | 2 g of ginger in<br>capsule before the<br>infusion of<br>vasopressin at 0.1 and<br>0.2 U/min iv for 30<br>min                         | 4                                        | N/A  | The infusion of<br>vasopressin at 0.1<br>and 0.2 U/min IV for<br>30 min                                | Two separate<br>days, at least 3<br>days apart, 1<br>hour before<br>the basal EGG<br>recording | Double-<br>blind                         |
| Shariatpanahi <i>et al.</i><br>(2009) [54] | Iran             | Randomized<br>controlled<br>trial              | Delayed gastric<br>emptying,<br>developing<br>ventilator-<br>associated<br>pneumonia,<br>clinical outcomes<br>in adult<br>respiratory<br>distress syndrome | 16                                          | 8/8  | 120 mg of ginger<br>extract added to tube<br>feeding/day, tid                                                                         | 16                                       | 8/8  | 1 g of coconut oil<br>added to tube<br>feeding/day, tid                                                | 21 days                                                                                        | Double-<br>blind<br>(nurse<br>unblinded) |
| Gonlachanvit <i>et al.</i><br>(2003) [55]  | United<br>States | Randomized<br>controlled<br>trial              | Hyperglycemia-<br>evoked gastric<br>dysrhythmias                                                                                                           | Hyperglycemic<br>clamping<br>studies:<br>14 | N/A  | Hyperglycemic<br>clamping studies:<br>500 mg of powdered<br>ginger root/cap, 2<br>capsules/dose + 20%<br>dextrose (i.v.) <sup>7</sup> | hyperglycemic<br>clamping<br>studies: 14 | N/A  | Hyperglycemic<br>clamping studies:<br>2 placebo<br>capsules/dose + 20%<br>dextrose (i.v.) <sup>7</sup> | Single-dose                                                                                    | Double-<br>blind                         |

|                                     |               |                                        |                                                     |                                            |                                |                                                                                                                                                                                    |                                            |               |                                                                                         |             |              |
|-------------------------------------|---------------|----------------------------------------|-----------------------------------------------------|--------------------------------------------|--------------------------------|------------------------------------------------------------------------------------------------------------------------------------------------------------------------------------|--------------------------------------------|---------------|-----------------------------------------------------------------------------------------|-------------|--------------|
|                                     | United States | Randomized controlled trial            | Hyperglycemia-evoked gastric dysrhythmias           | Prostaglandin E1 (misoprostol) studies: 11 | N/A                            | Prostaglandin E1 (misoprostol) studies: 500 mg of powdered ginger root/cap, 2 capsules/dose + 400 µg of misoprostol                                                                | prostaglandin E1 (misoprostol) studies: 11 | N/A           | Prostaglandin E1 (misoprostol) studies: 2 placebo capsules/dose + 400 µg of misoprostol | Single dose | Double-blind |
| Haghighi <i>et al.</i> (2005) [56]  | Iran          | Randomized controlled trial            | Osteoarthritis                                      | 40                                         | 29/11                          | 15 mg of ginger extract/cap, 2 capsules/day                                                                                                                                        | 40                                         | 28/12         | 15 mg of lactose/cap, 2 capsules/day                                                    | 1 month     | Double-blind |
|                                     | Iran          | Randomized controlled trial            | Osteoarthritis                                      | 40                                         | 29/11                          | 15 mg of ginger extract/tab, 2 tablets/day                                                                                                                                         | 40                                         | 32/8          | 400 mg of ibuprofen/cap, 3 capsules/day                                                 | 1 month     | Double-blind |
|                                     |               |                                        |                                                     |                                            |                                | Group 2: A capsule of 750 mg of powdered ginger and a capsule of placebo, twice/day<br>Group 3: A capsule of 750 mg powdered ginger and a tablet of 50 mg of diclofenac, twice/day |                                            |               |                                                                                         |             |              |
| Paramdeep <i>et al.</i> (2013) [57] | India         | Randomized open-label controlled trial | Osteoarthritis of knee                              | Group 2: 20<br>Group 3: 20                 | Group 2: 8/12<br>Group 3: 6/14 | 100 mg of ginger extract <sup>8</sup> + 500 mg of glucosamine/cap, 2 capsules/day                                                                                                  | Group 1: 20                                | Group 1: 6/14 | Group 1: A capsule of placebo and a tablet of 50 mg of diclofenac, twice/day            | 12 weeks    | Open-label   |
| Drozdov <i>et al.</i> (2012) [58]   | Russia        | Randomized controlled trial            | Osteoarthritis of the knee or hips                  | 21                                         | 4/17                           | 170 mg of ginger extract                                                                                                                                                           | 22                                         | 4/18          | 100 mg of diclofenac/tab, 1 tablet/day with 1000 mg of glucosamine                      | 4 weeks     | N/A          |
| Bliddal <i>et al.</i> (2000) [59]   | Denmark       | Crossover randomized controlled trial  | Clinical dysfunction and pain due to osteoarthritis | 56                                         | 15/41                          | 170 mg of ginger extract                                                                                                                                                           | 56                                         | 15/41         | Placebo                                                                                 | 3 weeks     | Double-blind |
|                                     | Denmark       | Crossover randomized controlled trial  | Clinical dysfunction and pain due to osteoarthritis | 56                                         | 15/41                          | 170 mg of ginger extract                                                                                                                                                           | 56                                         | 15/41         | 400 mg of ibuprofen                                                                     | 3 weeks     | Double-blind |

|                                         |               |                                       |                                                                                                   |    |      |                                                                                      |    |      |                                                 |                                              |              |
|-----------------------------------------|---------------|---------------------------------------|---------------------------------------------------------------------------------------------------|----|------|--------------------------------------------------------------------------------------|----|------|-------------------------------------------------|----------------------------------------------|--------------|
| Gregersen <i>et al.</i> (2013) [60]     | Denmark       | Crossover randomized controlled trial | Diet-induced thermogenesis                                                                        | 22 | 22/0 | 20 g of fine-chopped ginger in the stewed apples                                     | 22 | 22/0 | Placebo and other pungent spices <sup>9</sup>   | Single-dose                                  | Single-blind |
| Mansour <i>et al.</i> (2012) [61]       | United States | Crossover randomized controlled trial | Energy expenditure, feelings of appetite and satiety and metabolic risk factors in overweight men | 10 | 10/0 | Breakfast meal with 2 g of powdered ginger dissolved in hot water beverage           | 10 | 10/0 | Breakfast meal with hot beverage without ginger | Single-dose                                  | Open-label   |
| Janssen <i>et al.</i> (1996) [62]       | Netherlands   | Crossover randomized controlled trial | Anti-thrombotic effect                                                                            | 18 | 9/9  | 125 g of vanilla custard containing 15 g of Brazilian ginger root                    | 18 | 9/9  | 125 g of vanilla custard                        | 14 days                                      | Double-blind |
|                                         | Netherlands   | Crossover randomized controlled trial | Anti-thrombotic effect                                                                            | 18 | 9/9  | 125 g of vanilla custard containing 40 g of cooked stem ginger                       | 18 | 9/9  | 125 g of vanilla custard                        | 14 days                                      | Double-blind |
| Bordia <i>et al.</i> (1996) [63]        | N/A           | Randomized controlled trial           | Blood lipids, blood sugar, and platelet aggregation profiling                                     | 10 | N/A  | 4 g of powdered ginger/day for 3 months and 10 g of powdered ginger as a single dose | 10 | N/A  | Placebo                                         | 3 months                                     | N/A          |
| Jiang <i>et al.</i> (2004) [64]         | Australia     | Crossover randomized controlled trial | Pharmacokinetics and pharmacodynamics of warfarin in healthy subjects                             | 12 | 12/0 | 400 mg of powdered ginger rhizome/tab, 3 tablets/day                                 | 12 | 12/0 | No intervention                                 | 1 week after warfarin administration (25 mg) | Open-label   |
| Shariatpanahi <i>et al.</i> (2013) [65] | Iran          | Randomized controlled trial           | Acute respiratory distress syndrome                                                               | 16 | 8/8  | 120 mg of ginger extract                                                             | 16 | 8/8  | 1 g of coconut oil                              | 21 days                                      | Double-blind |

|                                    |      |                                   |        |    |     |                                                      |    |     |         |          |     |
|------------------------------------|------|-----------------------------------|--------|----|-----|------------------------------------------------------|----|-----|---------|----------|-----|
| Rouhi <i>et al.</i><br>(2006) [66] | Iran | Randomized<br>controlled<br>trial | Asthma | 46 | N/A | 20 drops of ginger<br>solution/8 hours <sup>10</sup> | 46 | N/A | Placebo | 2 months | N/A |
|------------------------------------|------|-----------------------------------|--------|----|-----|------------------------------------------------------|----|-----|---------|----------|-----|

1: Core body temperature  
2: Finger skin blood flow  
3: Sweating rates  
4: Two capsules of ginger (placebo) at 30 min before and one capsule at 6 and 12 h after chemotherapy together with standard antiemetics in day 1. From day 2 to day 5, they received on capsule of ginger (or metoclopramide) four times a day.  
5: Patient  $\geq 20$  kg and  $< 40$  kg: 6 capsules/day containing 167 mg ginger powder (total dose: 1,000 mg/day); patient  $\geq 40$  kg and  $< 60$  kg: 5 capsules/day containing 400 mg ginger powder (total dose: 2,000 mg/day)  
6: Granisetron plus dexamethasone  
7: To achieve a plasma glucose concentration between 250 and 290 mg/dL  
8: Corresponds to 2000 mg of dry ginger rhizome  
9: 8.3 g of shredded horseradish, 21 g of Dijon mustard, 1.3 g of black pepper  
10: 150 mg as powdered ginger in 25 drops of solution

**Table S3.** Evaluation system and key finding of the included studies with a quality score less than 10

| Author (year)                      | Evaluation outcome system                                                                                                                                              | Main result                                                                                                                                                                                                                                                              | Adverse effect |
|------------------------------------|------------------------------------------------------------------------------------------------------------------------------------------------------------------------|--------------------------------------------------------------------------------------------------------------------------------------------------------------------------------------------------------------------------------------------------------------------------|----------------|
| Bossi <i>et al.</i> (2017) [1]     | Incidence and intensity of nausea (VAS), impact of nausea on daily life (FLIE questionnaire), nausea and vomiting domain scores, impact of fatigue (BFI questionnaire) | Cancer patients receiving highly emetogenic chemotherapy did not show beneficial effect of ginger treatment regarding the reduction of CINV (delayed, intercycle, and anticipatory).                                                                                     | No             |
| Konmun <i>et al.</i> (2017) [2]    | Complete response, intensity of nausea and appetite (by Intensity of nausea and appetite), quality of life (by Functional Assessment of Cancer Therapy-General)        | In addition to highly emetogenic chemotherapy using ondansetron, metoclopramide, dexamethasone, 6-gingerol has reduced complete response rate significantly in both acute and delayed CINV.                                                                              | No             |
| Zeraati <i>et al.</i> (2016) [3]   | Severity of nausea (by VAS), retching incidents                                                                                                                        | Ginger extract showed improvement in terms of reducing the incidence and mean severity score of nausea and vomiting during the cesarean section.                                                                                                                         | No             |
| Rad <i>et al.</i> (2018) [4]       | PVAS, multidimensional verbal rating scale (MVRS), and pictorial, blood loss assessment chart (PBAC)                                                                   | Ginger is as effective as mefenamic acid in relieving pain with primary dysmenorrhea.                                                                                                                                                                                    | No             |
| Shirvani <i>et al.</i> (2017) [5]  | Pain intensity (by VAS), pain duration, and menstruation characteristics (menstrual cycle duration, duration on menstruation, severity of dysmenorrhea, bleeding)      | Instead of taking ginger for reducing pain and dysmenorrhea, stretching exercise is safer, low-cost treatment to effectively relieve the pain.                                                                                                                           | No             |
| Mashak <i>et al.</i> (2018) [6]    | Mean arterial pressure, heart rate, arterial oxygen saturation, cesarean duration, VAS                                                                                 | There is significant difference in mean score of post-spinal puncture headache between ginger treatment and control group except 12 hours after C-section.                                                                                                               | No             |
| Hashemi <i>et al.</i> (2019) [7]   | Pain (by VAS), IL-6, CRP                                                                                                                                               | There is no significant difference in levels of VAS and IL-6 when comparing ginger group and vitamin B6 group, however, level of CRP in ginger group significantly decreased.                                                                                            | No             |
| Hasanvand <i>et al.</i> (2018) [8] | Serum troponin I level, chest pain (by numeric rating scale)                                                                                                           | Chest pain occurred during coronary angioplasty could be reduced by taking ginger. Also, as taking ginger is better regarding convenience and no significant complication, it could be a better choice for therapeutic agents in reducing chest pain during angioplasty. | No             |
| Azimi <i>et al.</i> (2016) [9]     | sICAM-1, systolic blood pressure, diastolic blood pressure, anthropometric measures                                                                                    | In within-group comparison, ginger intake significantly reduced the concentration of sICAM-1 and affected systolic blood pressure.                                                                                                                                       | No             |
| Shidfar <i>et al.</i> (2015) [10]  | Serum concentration of glucose, insulin, hs-CRP, paraoxonase-1, TAC, MDA, HbA1c, HOMA-IR                                                                               | Serum glucose, HbA1c, insulin, insulin resistance, hs-CRP significantly decreased while paraoxonase-1, TAC and MDA significantly increased by supplementation of ginger in T2DM patients.                                                                                | No             |
| Tabibi <i>et al.</i> (2015) [11]   | Triglyceride, total cholesterol, LDL-C, HDL-C, lipoprotein (a), IL-6                                                                                                   | Administrating 1000mg ginger daily reduces serum triglyceride concentration in peritoneal dialysis patients.                                                                                                                                                             | No             |

|                                           |                                                                                                                              |                                                                                                                                                                                                                                                                                                      |     |
|-------------------------------------------|------------------------------------------------------------------------------------------------------------------------------|------------------------------------------------------------------------------------------------------------------------------------------------------------------------------------------------------------------------------------------------------------------------------------------------------|-----|
| Karimi <i>et al.</i> (2015) [12]          | IL-10, hs-CRP, insulin, insulin resistance, glucose, TG, TC, LDL-Cholesterol, HDL- Cholesterol, HDL/LDL-Cholesterol          | The ginger treatment and the water-base exercise reduced the hs-CRP, IL-10, insulin, glucose, insulin resistance, LDL- Cholesterol, TG levels but increased the HDL- Cholesterol and HDL-Cholesterol /LDL- Cholesterol. The combination showed a better effect than alone supplementation.           | No  |
| Emrani <i>et al.</i> (2016) [13]          | Nausea (VAS score), number of vomiting, anti-TB-induced hepatotoxicity, time to onset of anti-TB-induced hepatotoxicity      | Ginger can be considered as a potential additional therapy to prevent gastrointestinal adverse reactions including hepatotoxicity, which was induced by antituberculosis.                                                                                                                            | Yes |
| Kulkarni <i>et al.</i> (2016) [14]        | TNF-alpha, ferritin, MDA                                                                                                     | Ginger supplementation significantly reduced the levels of TNF alpha, ferritin and MDA in ginger supplemented group in comparison to baseline. Ginger supplementation with antitubercular treatment significantly lowered TNF alpha, ferritin and MDA concentrations in comparison to control group. | No  |
| Miyamoto <i>et al.</i> (2015) [15]        | Thermal sensation and thermal comfort, oxygen consumption, CO2 production, respiratory exchange ratio, serum-free fatty acid | The effect of treating ginger seems to have no effect in peripheral and central thermoregulatory function. However, treating ginger can affect fat utilization and the treating time also can affect fat utilization.                                                                                | No  |
| Manusirivithaya <i>et al.</i> (2004) [16] | Nausea score, number of days of nausea                                                                                       | The addition of ginger to standard antiemetic regimen has no advantage in reducing nausea or vomiting in acute phase of cisplatin-induced emesis. In delayed phase, ginger and metoclopramide have no statistically significant difference in efficacy.                                              | No  |
| Pillai <i>et al.</i> (2011) [17]          | ESAS                                                                                                                         | Ginger root powder was effective in reducing severity of acute and delayed CINV as additional therapy to ondansetron and dexamethasone in patients receiving high emetogenic chemotherapy.                                                                                                           | No  |
| Panahi <i>et al.</i> (2012) [18]          | The modified form of RINVR                                                                                                   | Standard antiemetic therapy with ginger significantly reduced prevalence of nausea 6 to 24 h post-chemotherapy. However, there is no other advantage in reducing prevalence or severity of CINV.                                                                                                     | No  |
| Sontakke <i>et al.</i> (2002) [19]        | Control of nausea and vomiting                                                                                               | Efficacy of ginger in term of antiemetic was as effective as metoclopramide in cancer patients who used low dose cyclophosphamide with cytotoxics causing mild emesis                                                                                                                                | No  |
| Arslan <i>et al.</i> (2014) [20]          | Nausea intensity, nausea, vomiting and, retching episodes                                                                    | In the first 3 days of chemotherapy, administering ginger powder could be effective in reducing the severity of CINV in breast cancer patients who received anthracycline-based chemotherapy.                                                                                                        | No  |
| Mohammadbeigi <i>et al.</i> (2011) [21]   | Vomiting, Nausea, Rhodes index                                                                                               | Ginger and metoclopramide groups had no significant effect, however, there was a significant difference in reducing vomiting and nausea caused by pregnancy compared to placebo group.                                                                                                               | No  |
| Ozgoli <i>et al.</i> (2009) [22]          | Nausea intensity and vomiting episodes                                                                                       | Ginger treatment significantly decreased nausea intensity and vomiting episodes in pregnancy.                                                                                                                                                                                                        | No  |
| Keating <i>et al.</i> (2002) [23]         | Degree of nausea and vomiting, number of vomiting episodes, daily functioning related to symptoms.                           | It was good option for early pregnancy to take 1g of ginger in syrup or capsules daily as antiemetics.                                                                                                                                                                                               | Yes |

|                                        |                                                                                                                                                                                                                                           |                                                                                                                                                                                                                                                       |     |
|----------------------------------------|-------------------------------------------------------------------------------------------------------------------------------------------------------------------------------------------------------------------------------------------|-------------------------------------------------------------------------------------------------------------------------------------------------------------------------------------------------------------------------------------------------------|-----|
| Pongrojapaw <i>et al.</i> (2007) [24]  | Visual analogue nausea scores (VANS) and vomiting times                                                                                                                                                                                   | Ginger showed similar effect with dimenhydrinate 3-7 days after the treatment. Therefore, taking ginger can be an alternative choice for the treatment of nausea and vomiting for pregnant women.                                                     | Yes |
| Saberi <i>et al.</i> (2009) [25]       | Nausea, vomiting, and retching (by Rhodes Index Score)                                                                                                                                                                                    | At less than 16 weeks gestation, ginger was an effective treatment for the relieving in mild to moderate nausea and vomiting in pregnant women.                                                                                                       | No  |
| Javadi <i>et al.</i> (2013) [26]       | Nausea and vomiting (by MPUQE score)                                                                                                                                                                                                      | There was no significant difference in efficacy of ginger and Vitamin B6 regarding reduction of symptoms of pregnancy-induced nausea.                                                                                                                 | No  |
| Apariman <i>et al.</i> (2006) [27]     | VAS, presences of vomiting at 0-2/2-6 hour postoperation                                                                                                                                                                                  | VAS in ginger group was significantly lower than placebo group at 6 hour postoperation, but there were no statistically significant differences in any other indexes.                                                                                 | No  |
| Nanthakomon <i>et al.</i> (2006) [28]  | Frequency of vomiting, nausea (by VAS)                                                                                                                                                                                                    | Ginger treatment showed a significant effect in preventing nausea and vomiting of post major gynecologic surgery                                                                                                                                      | No  |
| Kalava <i>et al.</i> (2013) [28]       | The intraoperative incidence of nausea, the number of episodes of intraoperative nausea, the incidence of intraoperative vomiting, the number of episodes of vomiting in the first 24 h after surgery, severity of nausea postoperatively | The frequency of episodes of intraoperative nausea was significantly reduced in ginger group comparing with placebo group. However, frequency of nausea, vomiting, and pain during and after an elective cesarean section was not affected by ginger. | Yes |
| Visalyaputra <i>et al.</i> (1997) [30] | Incidence and severity of PONV (nausea score and vomiting frequency)                                                                                                                                                                      | Incidence of PONV after gynecological laparoscopy was not reduced by taking 2 g of ginger, 1.25 mg of droperidol or both.                                                                                                                             | No  |
| Phillips <i>et al.</i> (1993) [31]     | Nausea (number of complaints), vomiting (number of episodes), postoperative analgesic                                                                                                                                                     | Ginger was useful as a promising antiemetic, especially for day case surgery.                                                                                                                                                                         | No  |
| Bone <i>et al.</i> (1990) [32]         | Incidences of nausea, vomiting, retching, sedation, abnormal movements, pain, itching and eye disturbances at the four assessment times, nausea and pain grade, postoperative use of analgesia                                            | The antiemetics effectiveness of ginger group was significantly better than placebo group, and other antiemetic groups in patients after receiving the major gynecological surgery.                                                                   | No  |
| Tavlan <i>et al.</i> (2006) [33]       | Nausea (mild, moderate, severe), retching, episode of vomiting, rescue antiemetics                                                                                                                                                        | Ginger treatment combination with dexamethasone for reducing postoperative nausea and vomiting did not have significant result compared with the result when using dexamethasone alone.                                                               | No  |
| Dabaghzadeh <i>et al.</i> (2014) [34]  | Nausea (by VAS), number of vomiting episodes                                                                                                                                                                                              | Ginger was useful to prevent nausea and vomiting-induced by antiretroviral regimens.                                                                                                                                                                  | No  |
| Holtmann <i>et al.</i> (1989) [34]     | Optokinetic nystagmus, caloric response, postrotatory nystagmus                                                                                                                                                                           | Ginger had little effect on the vestibular or the oculomotor system.                                                                                                                                                                                  | No  |
| Grontved <i>et al.</i> (1988) [36]     | Seasickness (nausea, vertigo, vomiting, and cold sweating scores)                                                                                                                                                                         | Ginger is effective in reducing vomiting and cold sweating when compared with placebo.                                                                                                                                                                | No  |
| Grontved <i>et al.</i> (1985) [37]     | Vertigo score, nystagmus duration, maximum slow phase velocity of nystagmus                                                                                                                                                               | Motion sickness symptoms such as vertigo, nausea, vomiting, cold sweat are reduced better by taking ginger root than placebo group.                                                                                                                   | No  |

|                                              |                                                                                                                                          |                                                                                                                                                                                                                                                                                                                                                               |     |
|----------------------------------------------|------------------------------------------------------------------------------------------------------------------------------------------|---------------------------------------------------------------------------------------------------------------------------------------------------------------------------------------------------------------------------------------------------------------------------------------------------------------------------------------------------------------|-----|
| Mowrey <i>et al.</i> (1982) [38]             | Times in revolving chair and power functions for magnitude estimations                                                                   | Ginger treatment showed higher effect in reducing the gastrointestinal distress in motion sickness compared to demenhydrinate and placebo treatment.                                                                                                                                                                                                          | No  |
| Stewart <i>et al.</i> (1990) [39]            | Head movements, gastric emptying, electrogastrography                                                                                    | Ginger did not have anti-motion sickness activity and had no function of altering gastric function during motion sickness.                                                                                                                                                                                                                                    | Yes |
| Jenabi (2013) [40]                           | Pain (by VAS)                                                                                                                            | Ginger treatment significantly reduced VAS of post-therapy pain compared with placebo group.                                                                                                                                                                                                                                                                  | No  |
| Shirvani <i>et al.</i> (2014) [41]           | Severity of dysmenorrhea 100mm visual analog scale (by VAS), severity of dysmenorrhea, pain duration, cycle duration and bleeding volume | There was no significant difference in terms of pain intensity, severity of dysmenorrhea, pain duration, cycle duration and bleeding volume between two groups. The menstrual days were longer in ginger group in first and second cycle.                                                                                                                     | No  |
| Black <i>et al.</i> (2008) [42]              | Heart rate, oxygen consumption, work rate, quadriceps muscle pain, ratings of perceived exertion, values for total mood disturbance      | Compared with placebo, ginger had no clinically meaningful or statistically significant effect on perceptions of muscle pain, ratings of perceived exertion, work rate, heart rate, or oxygen uptake during exercise. Recovery of oxygen uptake and heart rate after the 30 min exercise followed a similar time course in the ginger and placebo conditions. | No  |
| Maghbooli <i>et al.</i> (2014) [43]          | Time of headache onset, severity, and response self-assessments                                                                          | Ginger showed similar effect to sumatriptan when patients relieved migraine attack.                                                                                                                                                                                                                                                                           | No  |
| Arablou <i>et al.</i> (2013) [44]            | Anthropometric indices <sup>1</sup> , glycemic and lipid profile                                                                         | There were significant differences between ginger intervention group and placebo group in serum FPG, HbA1c, Insulin, HOMA, TG, TC, CRP, PGE <sub>2</sub> while there were no significant differences in HDL, LDL and TNF-alpha.                                                                                                                               | No  |
| Mozaffari-Khosravi <i>et al.</i> (2014) [45] | FBS, HbA1c, fructosamine, QUICKI, BMI, fasting insulin, HOMA-IR, insulin sensitivity, beta-cell function                                 | FBS decreased 10.5% in ginger intake group while it increased 21% in placebo group. There is significant difference in fasting insulin level, insulin sensitivity, HOMA-IR, QUICKI more increased in ginger group significantly.                                                                                                                              | No  |
| Andallu <i>et al.</i> (2001) [46]            | Body weight, blood glucose, total cholesterol, triglycerides, HDL cholesterol, LDL cholesterol, VLDL cholesterol                         | Ginger treatment may be helpful in reducing blood glucose and serum lipid levels in diabetic or hypercholesterolemic people.                                                                                                                                                                                                                                  | No  |
| Karimi <i>et al.</i> (2013) [47]             | Adiponectin, glutathione peroxidase, nitric oxide, MDA                                                                                   | It was concluded that ginger could reduce oxidative stress in obese women who were diagnosed with breast cancer.                                                                                                                                                                                                                                              | No  |
| Atashak <i>et al.</i> (2011) [48]            | CRP, HOMA-IR, Insulin, blood lipids (total cholesterol, LDL-C, HDL-C, TG), anthropometric measurements                                   | This study showed that treating ginger supplements alone or combination may reduce chronic inflammation.                                                                                                                                                                                                                                                      | No  |
| Alizadeh-Navaei <i>et al.</i> (2008) [49]    | Lipid levels (fasting serum TG, cholesterol, HDL, LDL, and VLDL), fasting lipoprotein- $\alpha$ , fasting homocysteine                   | The mean change level of triglyceride and cholesterol was significantly higher in ginger group than control group. In addition, the significant reduction of TC, cholesterol, LDL, VLDL, lipoprotein- $\alpha$ and homocysteine were observed when comparing the before and after ginger treatment.                                                           | No  |

|                                         |                                                                                                                                                                                                              |                                                                                                                                                                                                                                |     |
|-----------------------------------------|--------------------------------------------------------------------------------------------------------------------------------------------------------------------------------------------------------------|--------------------------------------------------------------------------------------------------------------------------------------------------------------------------------------------------------------------------------|-----|
| Imani <i>et al.</i> (2014) [50]         | Serum fasting glucose, carboxymethyl lysine, pentosidine, MDA, hs-CRP, sICAM-1, sVCAM-1, sE-selectin                                                                                                         | Administering 1000 mg ginger daily reduced serum fasting glucose in patients undergoing peritoneal dialysis.                                                                                                                   | No  |
| Hu <i>et al.</i> (2011) [51]            | Antral area, antral contractions, fundic area and diameter, and gastric half-emptying time (T50)                                                                                                             | Gastric half-emptying time was more rapid in ginger treatment group than placebo group. There is no significant difference in any other parameters.                                                                            | No  |
| Wu <i>et al.</i> (2007) [52]            | Antral area, antral contraction, gastric half-emptying time, fundic area and diameter, gastrointestinal sensations score (by VAS)                                                                            | In ginger treatment group, the antral area and gastric half-emptying time were decreased more rapidly while the frequency of antral contractions was increased.                                                                | No  |
| Lien <i>et al.</i> (2002) [52]          | Vection-induced gastric dysrhythmias (EGG), vection-induced elevation of plasma vasopressin, vasopressin-evoked nausea, vasopressin-evoked gastric dysrhythmias                                              | Ginger treatment has the effect in reducing the severity of nausea, tachygastric activity, and vasopressin release.                                                                                                            | No  |
| Shariatpanahi <i>et al.</i> (2009) [54] | Mean nutritional intake on first 48 h, Mean nutritional intake on total period of study, ICU free days, ventilator-free days, mortality, nosocomial pneumonia                                                | Reducing delayed gastric emptying, eliminating the use of transpyloric feeding and preventing the development of nosocomial pneumonia can be achieved by gastric feeding with ginger extract.                                  | No  |
| Gonlachanvit <i>et al.</i> (2003) [55]  | Plasma glucose level, electrogastrography, hyperglycemic clamping technique                                                                                                                                  | Ginger root could prevent slow-wave dysrhythmias evoked by acute hyperglycemia. However, no influence was recorded on dysrhythmias induced by a prostaglandin E1 analog.                                                       | No  |
| Haghighi <i>et al.</i> (2005) [56]      | Severity of pain, gelling pain score, joint swelling score, joint motion slope score                                                                                                                         | Regarding relieving symptoms of osteoarthritis, the ginger and ibuprofen groups were significantly more affected than the placebo group, however, there was no significant difference between the ginger and ibuprofen groups. | No  |
| Paramdeep <i>et al.</i> (2013) [57]     | WOMAC index, pain (by VAS)                                                                                                                                                                                   | this study indicates that ginger added additional effect regarding analgesic and anti-inflammatory effect in patients of Osteoarthritis.                                                                                       | Yes |
| Drozдов <i>et al.</i> (2012) [58]       | PGE1, PGE2, PGF2 $\alpha$ , PGI2, serum gastrin-17 levels severity of dyspepsia assessment form, arthritic pain (by VAS)                                                                                     | Treatment combination of ginger and glucosamine was as effective as NSAID in OA patients and may have an additional gastro protective effect.                                                                                  | No  |
| Bliddal <i>et al.</i> (2000) [59]       | Pain assessment (by VAS), Lequesne-index for either hip or knee, range of motion                                                                                                                             | The result suggested that the treating ginger to deal with the pain and dysfunction of osteoarthritis of the hip or knee is more effective than placebo but less effective than ibuprofen.                                     | No  |
| Gregersen <i>et al.</i> (2013) [60]     | Diet-induced thermogenesis, respiratory quotient, and substrate oxidation, catecholamines, hemodynamic factors, ad libitum energy intake, appetite measures, energy balance, blood parameters                | At palatable levels in food, ginger had no significant effects on any of the primary or secondary outcome measures relating to energy metabolism, appetite or food intake.                                                     | No  |
| Mansour <i>et al.</i> (2012) [61]       | Increase of Thermic Effect of Food (difference between post-prandial energy expenditure and resting metabolic rate), AUC for Thermic Effect of Food, post-prandial energy expenditure, respiratory quotient, | Ginger may have a potential effect on weight management by enhancing thermogenesis and reducing feelings of hunger.                                                                                                            | No  |

|                                         |                                                                                                                                                              |                                                                                                                                                                                                                                                             |    |
|-----------------------------------------|--------------------------------------------------------------------------------------------------------------------------------------------------------------|-------------------------------------------------------------------------------------------------------------------------------------------------------------------------------------------------------------------------------------------------------------|----|
|                                         | AUC of VAS ratings of hunger, AUC for VAS ratings of food intake, AUC for VAS ratings of greater fullness, glucose, insulin, lipids, or inflammatory markers |                                                                                                                                                                                                                                                             |    |
| Janssen <i>et al.</i> (1996) [62]       | Maximum ex vivo platelet thromboxane B2 production                                                                                                           | It was concluded that ginger intake had no significant effect on anti-thrombotic.                                                                                                                                                                           | No |
| Bordia, <i>et al.</i> (1996) [63]       | Adenosine diphosphate-induced platelet aggregation, epinephrine-induced platelet aggregation, blood lipids, blood sugar                                      | A 4 g daily of ginger intake showed no effect on adenosine diphosphate- and epinephrine-induced platelet aggregation, blood lipid, and blood sugar. 10 g of single dose after 4 h had a significant effect in reducing platelet aggregation.                | No |
| Jiang <i>et al.</i> (2004) [64]         | Pharmacokinetic parameters, pharmacodynamic parameters Platelet aggregation                                                                                  | Ginger did not show significant effect on the pharmacokinetics or pharmacodynamics of warfarin and clotting status.                                                                                                                                         | No |
| Shariatpanahi <i>et al.</i> (2013) [65] | IL-1, IL-6, TNF-alpha, LTB4, red blood cell glutathione, organ failure-free days                                                                             | Patients consumed ginger have a significant lower level of IL-1, IL-6, and TNF alpha but significant higher level of red blood cell glutathione. Ginger treatment group has less duration of mechanical ventilation and length of intensive care unit stay. | No |
| Rouhi <i>et al.</i> (2006) [66]         | Dyspnea, wheezing, chest tightness, stage of disease, nocturnal cough, spray dosage, dyspnea attack, FEF25-75, FEV1, FVC                                     | This study showed that 1-4 g of ginger is effective in reducing asthmatic symptoms, but ineffective in spirometry findings and changing the stage of the disease.                                                                                           | No |

1: Body weight, BMI, serum FPG, HbA1c, Insulin, HOMA, TG, TC, HDL, LDL, CRP, TNF-alpha, PGE<sub>2</sub>  
CINV: chemotherapy-induced nausea and vomiting; CRP: C-reactive protein; FBS: fasting blood sugar; FLIE-5DR: functional living index emesis 5 day recall; hs-CRP: high-sensitivity C-reactive protein; HOMA-IR: homeostasis model assessment of insulin resistance; HDL-C: high density lipoprotein-cholesterol; HbA1c: Hemoglobin A1c; IL: interleukin; LDL-C: low density lipoprotein-cholesterol; MDA: malondialdehyde; PVAS: pain visual analog scale; QUICKI: quantitative insulin sensitivity check index; RINVR: Rhodes Inventory of Nausea, Vomiting and Retching; TNF- $\alpha$ : tumor necrosis factor alpha; TAC: total antioxidant capacity; VAS: visual analog scale; ESAS: edmonton's symptom assessment scale; PG: prostaglandins; sICAM-1: soluble intercellular adhesion molecule type 1; sVCAM-1: soluble vascular cell adhesion molecule type 1; WOMAC: Western Ontario and McMaster Universities osteoarthritis

1. Bossi, P.; Cortinovis, D.; Fatigoni, S.; Cossu Rocca, M.; Fabi, A.; Seminara, P.; Ripamonti, C.; Alfieri, S.; Granata, R.; Bergamini, C., et al. A randomized, double-blind, placebo-controlled, multicenter study of a ginger extract in the management of chemotherapy-induced nausea and vomiting (CINV) in patients receiving high-dose cisplatin. *Annals of Oncology* 2017, 28, 2547-2551, doi:10.1093/annonc/mdx315.
2. Konmun, J.; Danwilai, K.; Ngamphaiboon, N.; Sripanidkulchai, B.; Sookprasert, A.; Subongkot, S. A phase II randomized double-blind placebo-controlled study of 6-gingerol as an anti-emetic in solid tumor patients receiving moderately to highly emetogenic chemotherapy. *Medical Oncology* 2017, 34, 69, doi:10.1007/s12032-017-0931-4.
3. Zeraati, H.; Shahinfar, J.; Imani Hesari, S.; Masrorniya, M.; Nasimi, F. The Effect of Ginger Extract on the Incidence and Severity of Nausea and Vomiting After Cesarean Section Under Spinal Anesthesia. *Anesth Pain Med* 2016, 6, e38943-e38943, doi:10.5812/aapm.38943.
4. Adib Rad, H.; Basirat, Z.; Bakouei, F.; Moghadamnia, A.A.; Khafri, S.; Farhadi Kotenaei, Z.; Nikpour, M.; Kazemi, S. Effect of Ginger and Novafen on menstrual pain: A cross-over trial. *Taiwanese Journal of Obstetrics and Gynecology* 2018, 57, 806-809, doi:https://doi.org/10.1016/j.tjog.2018.10.006.
5. Shirvani, M.A.; Motahari-Tabari, N.; Alipour, A. Use of ginger versus stretching exercises for the treatment of primary dysmenorrhea: a randomized controlled trial. *Journal of Integrative Medicine* 2017, 15, 295-301, doi:https://doi.org/10.1016/S2095-4964(17)60348-0.
6. Mashak, B.; Hashemnejad, M.; Kabir, K.; Refaei, M.; Saeieh, S.; Torkashvand, S.; Salehi, L.; Yazdkhasti, M.J.I.J.o.W.s.H.; Sciences, R. The effect of ginger on preventing post-spinal puncture headache in patients undergoing cesarean section. 2019, 7, 204-210.
7. Hashemi, M.; Ghasemi, M.; Taheri, M.; Dadkhah, P.J.E.J.o.G.M. Comparing the effect of ginger and vitamin D3 supplement on inflammatory factors and pain severity in adults with low back pain. 2019, 16.
8. Hasanvand, A.; Ebrahimi, Y.; Mohamadi, A.; Nazari, A.J.J.o.H.P. Zingiber officinale Roscoe reduces chest pain on patients undergoing coronary angioplasty: a clinical trial. 2019, 8.
9. Azimi, P.; Ghiasvand, R.; Feizi, A.; Hosseinzadeh, J.; Bahreynian, M.; Hariri, M.; Khosravi-Boroujeni, H. Effect of cinnamon, cardamom, saffron and ginger consumption on blood pressure and a marker of endothelial function in patients with type 2 diabetes mellitus: A randomized controlled clinical trial. *Blood Pressure* 2016, 25, 133-140, doi:10.3109/08037051.2015.1111020.
10. Shidfar, F.; Rajab, A.; Rahideh, T.; Khandouzi, N.; Hosseini, S.; Shidfar, S.J.J.o.c.; medicine, i. The effect of ginger (Zingiber officinale) on glycemic markers in patients with type 2 diabetes. 2015, 12, 165-170.
11. Tabibi, H.; Imani, H.; Atabak, S.; Najafi, I.; Hedayati, M.; Rahmani, L.J.P.D.I. Effects of ginger on serum lipids and lipoproteins in peritoneal dialysis patients: a randomized controlled trial. 2016, 36, 140-145.
12. Karimi, N.; Dabidi Roshan, V.; Fathi Bayatiyani, Z. Individually and Combined Water-Based Exercise With Ginger Supplement, on Systemic Inflammation and Metabolic Syndrome Indices, Among the Obese Women With Breast Neoplasms. *Iran J Cancer Prev* 2015, 8, e3856-e3856, doi:10.17795/ijcp-3856.
13. Emrani, Z.; Shojaei, E.; Khalili, H. Ginger for Prevention of Antituberculosis-induced Gastrointestinal Adverse Reactions Including Hepatotoxicity: A Randomized Pilot Clinical Trial. *Phytotherapy Research* 2016, 30, 1003-1009, doi:10.1002/ptr.5607.
14. Kulkarni, R.A.; Deshpande, A.R.J.J.o.C.; Medicine, I. Anti-inflammatory and antioxidant effect of ginger in tuberculosis. 2016, 13, 201-206.
15. Miyamoto, M.; Matsuzaki, K.; Katakura, M.; Hara, T.; Tanabe, Y.; Shido, O. Oral intake of encapsulated dried ginger root powder hardly affects human thermoregulatory function, but appears to facilitate fat utilization. *International Journal of Biometeorology* 2015, 59, 1461-1474, doi:10.1007/s00484-015-0957-2.
16. Manusirivithaya, S.; Sripramote, M.; Tangjitgamol, S.; Sheanakul, C.; Leelahakorn, S.; Thavaramara, T.; Tangcharoenpanich, K. Antiemetic effect of ginger in gynecologic oncology patients receiving cisplatin. *International Journal of Gynecologic Cancer* 2004, 14, 1063, doi:10.1136/ijgc-00009577-200411000-00002.
17. Pillai, A.K.; Sharma, K.K.; Gupta, Y.K.; Bakhshi, S. Anti-emetic effect of ginger powder versus placebo as an add-on therapy in children and young adults receiving high emetogenic chemotherapy. *Pediatric Blood & Cancer* 2011, 56, 234-238, doi:10.1002/pbc.22778.
18. Panahi, Y.; Saadat, A.; Sahebkar, A.; Hashemian, F.; Taghikhani, M.; Abolhasani, E. Effect of Ginger on Acute and Delayed Chemotherapy-Induced Nausea and Vomiting: A Pilot, Randomized, Open-Label Clinical Trial. *Integrative Cancer Therapies* 2012, 11, 204-211, doi:10.1177/1534735411433201.
19. Sontakke, S.; Thawani, V.; Naik, M.J.I.j.o.p. Ginger as an antiemetic in nausea and vomiting induced by chemotherapy: a randomized, cross-over, double blind study. 2003, 35, 32-36.
20. Arslan, M.; Ozdemir, L.J.C.j.o.o.n. Oral intake of ginger for chemotherapy-induced nausea and vomiting among women with breast cancer. 2015, 19.

21. Unit, G.J.P.J.o.B.S. Treatment of Pregnancy Nausea. 2011, 14, 817-820.
22. Ozgoli, G.; Goli, M.; Simbar, M. Effects of Ginger Capsules on Pregnancy, Nausea, and Vomiting. *The Journal of Alternative and Complementary Medicine* 2009, 15, 243-246, doi:10.1089/acm.2008.0406.
23. Keating, A.; Chez, R.A.J.A.t.i.h.; medicine. Ginger syrup as an antiemetic in early pregnancy. 2002, 8, 89.
24. Pongrojapaw, D.; Somprasit, C.; Chanthasenanont, A.J.J.-M.A.o.T. A randomized comparison of ginger and dimenhydrinate in the treatment of nausea and vomiting in pregnancy. 2007, 90, 1703.
25. Saberi, F.; Sadat, Z.; Abedzadeh-Kalahroudi, M.; Taebi, M. Effect of ginger on relieving nausea and vomiting in pregnancy: a randomized, placebo-controlled trial. *Nurs Midwifery Stud* 2014, 3, e11841-e11841, doi:10.17795/nmsjournal11841.
26. Haji Seid Javadi, E.; Salehi, F.; Mashrabi, O.J.O.; international, g. Comparing the effectiveness of vitamin b6 and ginger in treatment of pregnancy-induced nausea and vomiting. 2013, 2013.
27. Apariman, S.; Ratchanon, S.; WiriyaSirivej, B.J.J.-M.A.o.T. Effectiveness of ginger for prevention of nausea and vomiting after gynecological laparoscopy. 2006, 89, 2003.
28. Nanthakomon, T.; Pongrojapaw, D.J.J.M.A.T. The efficacy of ginger in prevention of postoperative nausea and vomiting after major gynecologic surgery. 2006, 89, S130-136.
29. Kalava, A.; Darji, S.J.; Kalstein, A.; Yarmush, J.M.; SchianodiCola, J.; Weinberg, J. Efficacy of ginger on intraoperative and postoperative nausea and vomiting in elective cesarean section patients. *European Journal of Obstetrics & Gynecology and Reproductive Biology* 2013, 169, 184-188, doi:https://doi.org/10.1016/j.ejogrb.2013.02.014.
30. Visalyaputra, S.; Petchpaisit, N.; Somcharoen, K.; Choavaratana, R. The efficacy of ginger root in the prevention of postoperative nausea and vomiting after outpatient gynaecological laparoscopy. *Anaesthesia* 1998, 53, 506-510, doi:10.1046/j.1365-2044.1998.00369.x.
31. Phillips, S.; Ruggier, R.; Hutchinson, S.E. Zingiber officinale (Ginger)—an antiemetic for day case surgery. *Anaesthesia* 1993, 48, 715-717, doi:10.1111/j.1365-2044.1993.tb07188.x.
32. Bone, M.E.; Wilkinson, D.J.; Young, J.R.; McNeil, J.; Charlton, S. Ginger root—a new antiemetic The effect of ginger root on postoperative nausea and vomiting after major gynaecological surgery. *Anaesthesia* 1990, 45, 669-671, doi:10.1111/j.1365-2044.1990.tb14395.x.
33. Tavlan, A.; Tuncer, S.; Erol, A.; Reisli, R.; Aysolmaz, G.; Otelcioglu, S. Prevention of Postoperative Nausea and Vomiting after Thyroidectomy. *Clinical Drug Investigation* 2006, 26, 209-214, doi:10.2165/00044011-200626040-00005.
34. Dabaghzadeh, F.; Khalili, H.; Dashti-Khavidaki, S.; Abbasian, L.; Moeinifard, A. Ginger for prevention of antiretroviral-induced nausea and vomiting: a randomized clinical trial. *Expert Opinion on Drug Safety* 2014, 13, 859-866, doi:10.1517/14740338.2014.914170.
35. Holtmann, S.; Clarke, A.H.; Scherer, H.; Höhn, M. The Anti-motion Sickness Mechanism of Ginger: A Comparative Study with Placebo and Dimenhydrinate. *Acta Oto-Laryngologica* 1989, 108, 168-174, doi:10.3109/00016488909125515.
36. Grøntved, A.; Brask, T.; Kambskard, J.; Hentzer, E. Ginger Root Against Seasickness: A Controlled Trial on the Open Sea. *Acta Oto-Laryngologica* 1988, 105, 45-49, doi:10.3109/00016488809119444.
37. Grøntved, A.; Hentzer, E. Vertigo-Reducing Effect of Ginger Root. *ORL* 1986, 48, 282-286, doi:10.1159/000275883.
38. Mowrey, D.; Clayson, D. MOTION SICKNESS, GINGER, AND PSYCHOPHYSICS. *The Lancet* 1982, 319, 655-657, doi:https://doi.org/10.1016/S0140-6736(82)92205-X.
39. Stewart, J.J.; Wood, M.J.; Wood, C.D.; Mims, M.E. Effects of Ginger on Motion Sickness Susceptibility and Gastric Function. *Pharmacology* 1991, 42, 111-120, doi:10.1159/000138781.
40. Jenabi, E.J.J.P.M.A. The effect of ginger for relieving of primary dysmenorrhoea. 2013, 63, 8-10.
41. Shirvani, M.A.; Motahari-Tabari, N.; Alipour, A. The effect of mefenamic acid and ginger on pain relief in primary dysmenorrhea: a randomized clinical trial. *Archives of Gynecology and Obstetrics* 2015, 291, 1277-1281, doi:10.1007/s00404-014-3548-2.
42. Christopher, D.B.; Patrick, J.O.C. Acute Effects of Dietary Ginger on Quadriceps Muscle Pain during Moderate-Intensity Cycling Exercise. *International Journal of Sport Nutrition and Exercise Metabolism* 2008, 18, 653-664, doi:10.1123/ijnsnem.18.6.653.
43. Maghbooli, M.; Golipour, F.; Moghimi Esfandabadi, A.; Yousefi, M. Comparison Between the Efficacy of Ginger and Sumatriptan in the Ablative Treatment of the Common Migraine. *Phytotherapy Research* 2014, 28, 412-415, doi:10.1002/ptr.4996.
44. Arablou, T.; Aryaeian, N.; Valizadeh, M.; Sharifi, F.; Hosseini, A.; Djalali, M. The effect of ginger consumption on glycemic status, lipid profile and some inflammatory markers in patients with type 2 diabetes

- mellitus. *International Journal of Food Sciences and Nutrition* 2014, 65, 515-520, doi:10.3109/09637486.2014.880671.
45. Mozaffari-Khosravi, H.; Talaei, B.; Jalali, B.-A.; Najarzadeh, A.; Mozayan, M.R. The effect of ginger powder supplementation on insulin resistance and glycemic indices in patients with type 2 diabetes: A randomized, double-blind, placebo-controlled trial. *Complementary Therapies in Medicine* 2014, 22, 9-16, doi:https://doi.org/10.1016/j.ctim.2013.12.017.
46. Andallu, B.; Radhika, B.; Suryakantham, V. Effect of aswagandha, ginger and mulberry on hyperglycemia and hyperlipidemia. *Plant Foods for Human Nutrition* 2003, 58, 1-7, doi:10.1023/B:QUAL.0000040352.23559.04.
47. Karimi, N.; Roshan, V.D.J.A.P.J.C.P. Change in adiponectin and oxidative stress after modifiable lifestyle interventions in breast cancer cases. 2013, 14, 2845-2850.
48. Atashak, S.; Peeri, M.; Azarbayjani, M.A.; Stannard, S.R.; Haghighi, M.M. Obesity-related cardiovascular risk factors after long- term resistance training and ginger supplementation. *J Sports Sci Med* 2011, 10, 685-691.
49. Alizadeh-Navaei, R.; Roozbeh, F.; Saravi, M.; Pouramir, M.; Jalali, F.; Moghadamnia, A.A.J.S.M.J. Investigation of the effect of ginger on the lipid levels. A double blind controlled clinical trial. 2008, 29, 1280-1284.
50. Imani, H.; Tabibi, H.; Najafi, I.; Atabak, S.; Hedayati, M.; Rahmani, L. Effects of ginger on serum glucose, advanced glycation end products, and inflammation in peritoneal dialysis patients. *Nutrition* 2015, 31, 703-707, doi:https://doi.org/10.1016/j.nut.2014.11.020.
51. Hu, M.-L.; Rayner, C.K.; Wu, K.-L.; Chuah, S.-K.; Tai, W.-C.; Chou, Y.-P.; Chiu, Y.-C.; Chiu, K.-W.; Hu, T.-H. Effect of ginger on gastric motility and symptoms of functional dyspepsia. *World J Gastroenterol* 2011, 17, 105-110, doi:10.3748/wjg.v17.i1.105.
52. Wu, K.-L.; Rayner, C.K.; Chuah, S.-K.; Changchien, C.-S.; Lu, S.-N.; Chiu, Y.-C.; Chiu, K.-W.; Lee, C.-M.J.E.j.o.g.; hepatology. Effects of ginger on gastric emptying and motility in healthy humans. 2008, 20, 436-440.
53. Lien, H.-C.; Sun, W.M.; Chen, Y.-H.; Kim, H.; Hasler, W.; Owyang, C.J.A.J.o.P.-G.; Physiology, L. Effects of ginger on motion sickness and gastric slow-wave dysrhythmias induced by circularvection. 2003, 284, G481-G489.
54. Shariatpanahi, Z.V.; Taleban, F.A.; Mokhtari, M.; Shahbazi, S. Ginger extract reduces delayed gastric emptying and nosocomial pneumonia in adult respiratory distress syndrome patients hospitalized in an intensive care unit. *Journal of Critical Care* 2010, 25, 647-650, doi:https://doi.org/10.1016/j.jcrc.2009.12.008.
55. Gonlachanvit, S.; Chen, Y.H.; Hasler, W.L.; Sun, W.M.; Owyang, C. Ginger Reduces Hyperglycemia-Evoked Gastric Dysrhythmias in Healthy Humans: Possible Role of Endogenous Prostaglandins. *Journal of Pharmacology and Experimental Therapeutics* 2003, 307, 1098, doi:10.1124/jpet.103.053421.
56. Haghighi, M.; Khalvat, A.; Toliati, T.; Jallaei, S. Comparing the effects of ginger (*Zingiber officinale*) extract and ibuprofen on patients with osteoarthritis. 2005.
57. Paramdeep, G.J.I.J.P.P. Efficacy and tolerability of ginger (*Zingiber officinale*) in patients of osteoarthritis of knee. 2013, 57, 177-183.
58. Drozdov, V.N.; Kim, V.A.; Tkachenko, E.V.; Varvanina, G.G. Influence of a Specific Ginger Combination on Gastropathy Conditions in Patients with Osteoarthritis of the Knee or Hip. *The Journal of Alternative and Complementary Medicine* 2012, 18, 583-588, doi:10.1089/acm.2011.0202.
59. Bliddal, H.; Rosetzky, A.; Schlichting, P.; Weidner, M.S.; Andersen, L.A.; Ibfelt, H.H.; Christensen, K.; Jensen, O.N.; Barslev, J. A randomized, placebo-controlled, cross-over study of ginger extracts and Ibuprofen in osteoarthritis. *Osteoarthritis and Cartilage* 2000, 8, 9-12, doi:https://doi.org/10.1053/joca.1999.0264.
60. Gregersen, N.T.; Belza, A.; Jensen, M.G.; Ritz, C.; Bitz, C.; Hels, O.; Frandsen, E.; Mela, D.J.; Astrup, A. Acute effects of mustard, horseradish, black pepper and ginger on energy expenditure, appetite, ad libitum energy intake and energy balance in human subjects. *British Journal of Nutrition* 2013, 109, 556-563, doi:10.1017/S0007114512001201.
61. Mansour, M.S.; Ni, Y.-M.; Roberts, A.L.; Kelleman, M.; RoyChoudhury, A.; St-Onge, M.-P. Ginger consumption enhances the thermic effect of food and promotes feelings of satiety without affecting metabolic and hormonal parameters in overweight men: A pilot study. *Metabolism* 2012, 61, 1347-1352, doi:https://doi.org/10.1016/j.metabol.2012.03.016.
62. Janssen, P.; Meyboom, S.; Van Staveren, W.; De Vegt, F.; Katan, M.J.E.J.o.C.N. Consumption of ginger (*Zingiber officinale* roscoe) does not affect ex vivo platelet thromboxane production in humans. 1996, 50, 772-774.
63. Bordia, A.; Verma, S.K.; Srivastava, K.C. Effect of ginger (*Zingiber officinale* Rosc.) and fenugreek (*Trigonella foenumgraecum* L.) on blood lipids, blood sugar and platelet aggregation in patients with coronary artery disease. *Prostaglandins, Leukotrienes and Essential Fatty Acids* 1997, 56, 379-384, doi:https://doi.org/10.1016/S0952-3278(97)90587-1.
64. Jiang, X.; Williams, K.M.; Liauw, W.S.; Ammit, A.J.; Roufogalis, B.D.; Duke, C.C.; Day, R.O.; McLachlan,

- A.J. Effect of ginkgo and ginger on the pharmacokinetics and pharmacodynamics of warfarin in healthy subjects. *British Journal of Clinical Pharmacology* 2005, 59, 425-432, doi:10.1111/j.1365-2125.2005.02322.x.
65. Vahdat Shariatpanahi, Z.; Mokhtari, M.; Taleban, F.A.; Alavi, F.; Salehi Surmaghi, M.H.; Mehrabi, Y.; Shahbazi, S. Effect of enteral feeding with ginger extract in acute respiratory distress syndrome. *Journal of Critical Care* 2013, 28, 217.e211-217.e216, doi:<https://doi.org/10.1016/j.jcrc.2012.04.017>.
66. Rouhi, H.; Ganji, F.; Nasri, H.J.P.J.N. Effects of Ginger on the improvement of asthma [the evaluation of Its treatmental effects]. 2006, 5, 373-376.

**Table S4.** Types of adverse effect, incidence rate, and dosage from 17 trials.

| Reference                       | Reported adverse effect | Reported case                      | Dosage (per day)         |
|---------------------------------|-------------------------|------------------------------------|--------------------------|
| Kashefi <i>et al.</i> (2013)    | Headache                | 2.17%                              | 750 mg                   |
|                                 | Diarrhea                | 0%                                 |                          |
|                                 | Heartburn               | 3.26%                              |                          |
| Kashefi <i>et al.</i> (2015)    | Heartburn               | 2.17%                              | 750 mg                   |
|                                 | Abdominal pain          | 2.17%                              |                          |
|                                 | Diarrhea                | 2.17%                              |                          |
| Aryaeian <i>et al.</i> (2019)   | Heartburn               | 3.03%                              | 1500 mg                  |
| Mahluji <i>et al.</i> (2013)    | Heartburn               | 3.57%                              | 2000 mg                  |
| Citronberg <i>et al.</i> (2013) | Bloating                | Overall, 70%                       | 2000 mg                  |
|                                 | Gas                     |                                    |                          |
|                                 | Nausea                  |                                    |                          |
|                                 | Heartburn               |                                    |                          |
| Wigler <i>et al.</i> (2003)     | Heartburn               | 6.90%                              | 1000 mg                  |
| Paramdeep <i>et al.</i> (2013)  | Nausea                  | 10.00%                             | 750 mg                   |
|                                 | Epigastric distress     | 10.00%                             |                          |
|                                 | Heartburn               | 10.00%                             |                          |
| Kalava <i>et al.</i> (2013)     | Heartburn               | 7.00%                              | 1000 mg                  |
|                                 | Diarrhea                | 4.00%                              |                          |
|                                 | Mouth irritation        | 1.00%                              |                          |
| Ryan <i>et al.</i> (2012)       | Heartburn               | N/A                                | 250 mg, 500 mg or 750 mg |
|                                 | Bruising/flushing       | N/A                                |                          |
|                                 | Rash                    | N/A                                |                          |
| Eberhart <i>et al.</i> (2003)   | Flu-like symptom        | 1.69% (300 mg/d), 1.75% (600 mg/d) | 300 mg or 600 mg         |
|                                 | Heartburn               | 1.69% (300 mg/d), 3.51% (600 mg/d) |                          |
|                                 | Cardiovascular symptom  | 0% (300 mg/d), 3.51% (600 mg/d)    |                          |
|                                 | Respiratory symptom     | 3.39% (300 mg/d), 0% (600 mg/d)    |                          |

|                                                                                                                                          |                                                      |                                                           |                    |
|------------------------------------------------------------------------------------------------------------------------------------------|------------------------------------------------------|-----------------------------------------------------------|--------------------|
|                                                                                                                                          | Infection                                            | 5.08% (300 mg/d), 0% (600 mg/d)                           |                    |
| <b>Emrani <i>et al.</i> (2016)</b>                                                                                                       | Heartburn                                            | 10.00%                                                    | 500 mg             |
| <b>Tilburg <i>et al.</i> (2014)</b>                                                                                                      | Not sure about the ginger's side effect <sup>1</sup> | N/A                                                       | 1000 mg or 2000 mg |
| <b>Zick <i>et al.</i> (2014)</b>                                                                                                         | Not sure about the ginger's side effect <sup>2</sup> | N/A                                                       | 2000 mg            |
| <b>Pongrojpraw <i>et al.</i> (2007)</b>                                                                                                  | Drowsiness                                           | 5.88%                                                     | 1000 mg            |
|                                                                                                                                          | Heartburn                                            | 15.29%                                                    |                    |
| <b>Firouzbakht <i>et al.</i> (2014)</b>                                                                                                  | Abdominal pain                                       |                                                           | 1000 mg            |
|                                                                                                                                          | Nausea                                               | 10.20%                                                    |                    |
|                                                                                                                                          | Heartburn                                            |                                                           |                    |
| <b>Stewart <i>et al.</i> (1990)</b>                                                                                                      | Gastric burning                                      | 37.50%                                                    | 500 mg or 1000 mg  |
|                                                                                                                                          | Intense urge to urinate                              | 25.00%                                                    |                    |
| <b>Yekta <i>et al.</i> (2012)</b>                                                                                                        | Heartburn                                            | 10.00% (anticipatory), 12.50% (acute),<br>5.00% (delayed) | 1000 mg            |
| 1: Headache, tiredness, heartburn, nausea, difficulty passing stool, more frequent stools, loose stools, bloating and hunger suppression |                                                      |                                                           |                    |
| 2: Bloating, urgency, gas, nausea, heartburn, sores in mouth and anorexia                                                                |                                                      |                                                           |                    |

**Table S5.** Quality assessment outcomes and quality assessment scores of the included studies.

| Author<br>(year)                        | Random<br>sequence<br>generation | Allocation<br>concealment | Blinding of<br>participants<br>and<br>personnel* | Blinding of<br>outcome<br>assessment* | Incomplete<br>outcome<br>data* | Selective<br>reporting | Other bias | QA score (L=2,<br>U=1, H=0) |
|-----------------------------------------|----------------------------------|---------------------------|--------------------------------------------------|---------------------------------------|--------------------------------|------------------------|------------|-----------------------------|
| Black <i>et al.</i><br>(2010)           | L                                | L                         | L                                                | H                                     | L                              | L                      | L          | 12                          |
| Black <i>et al.</i><br>(2008)           | U                                | L                         | L                                                | H                                     | L                              | L                      | H          | 9                           |
| Gregersen <i>et al.</i><br>(2013)       | L                                | H                         | U                                                | L                                     | L                              | L                      | H          | 9                           |
| Manusirivithaya <i>et al.</i><br>(2004) | U                                | H                         | L                                                | H                                     | L                              | L                      | H          | 7                           |
| Pillai <i>et al.</i><br>(2011)          | L                                | H                         | L                                                | H                                     | L                              | L                      | U          | 9                           |
| Kulkarni <i>et al.</i><br>(2016)        | U                                | H                         | U                                                | H                                     | L                              | L                      | H          | 6                           |
| Holtmann <i>et al.</i><br>(1989)        | U                                | H                         | L                                                | H                                     | L                              | L                      | H          | 7                           |
| Karimi <i>et al.</i><br>(2013)          | U                                | H                         | U                                                | H                                     | L                              | L                      | H          | 6                           |
| Attari, <i>et al.</i><br>(2016)         | U                                | L                         | L                                                | H                                     | L                              | L                      | L          | 11                          |
| Ensiyeh <i>et al.</i><br>(2009)         | L                                | L                         | L                                                | H                                     | L                              | L                      | L          | 12                          |
| Hashemi <i>et al.</i><br>(2019)         | U                                | L                         | L                                                | H                                     | U                              | L                      | H          | 8                           |

---

|                                                     |   |   |   |   |   |   |   |    |
|-----------------------------------------------------|---|---|---|---|---|---|---|----|
| <b>Haghighi <i>et al.</i></b><br><b>(2005)</b>      | U | H | L | H | L | L | H | 7  |
| <b>Mohammadbeigi <i>et al.</i></b><br><b>(2011)</b> | L | H | L | H | L | L | H | 8  |
| <b>Sharifzadeh <i>et al.</i></b><br><b>(2018)</b>   | L | L | L | L | L | L | H | 12 |
| <b>Maghbooli <i>et al.</i></b><br><b>(2014)</b>     | U | L | L | H | L | L | H | 9  |
| <b>Ozgoli <i>et al.</i></b><br><b>(2009)</b>        | H | L | L | L | L | L | L | 12 |
| <b>Kashefi <i>et al.</i></b><br><b>(2013)</b>       | L | L | L | L | H | H | L | 10 |
| <b>Janssen <i>et al.</i></b><br><b>(1996)</b>       | U | L | U | H | L | L | H | 8  |
| <b>Martins <i>et al.</i></b><br><b>(2018)</b>       | L | H | L | L | L | L | L | 12 |
| <b>Arfeen <i>et al.</i></b><br><b>(1995)</b>        | U | L | L | L | L | L | H | 11 |
| <b>Willetts <i>et al.</i></b><br><b>(2003)</b>      | L | L | L | L | L | L | H | 12 |
| <b>Marx <i>et al.</i></b><br><b>(2017)</b>          | L | H | L | L | L | L | L | 12 |
| <b>Azimi <i>et al.</i></b><br><b>(2016)</b>         | U | H | L | H | L | L | L | 9  |
| <b>Shariatpanahi <i>et al.</i></b><br><b>(2013)</b> | U | H | L | L | L | L | H | 9  |

---

|                                                    |   |   |   |   |   |   |   |    |
|----------------------------------------------------|---|---|---|---|---|---|---|----|
| <b>Bordia <i>et al.</i><br/>(1997)</b>             | U | H | U | H | L | L | H | 6  |
| <b>Shidfar <i>et al.</i><br/>(2015)</b>            | U | U | L | U | L | L | H | 9  |
| <b>Kashefi <i>et al.</i><br/>(2015)</b>            | L | L | L | L | L | L | L | 14 |
| <b>Sanaati <i>et al.</i><br/>(2016)</b>            | L | L | L | L | L | L | L | 14 |
| <b>Rad <i>et al.</i><br/>(2018)</b>                | U | H | L | H | L | L | L | 9  |
| <b>Arablou <i>et al.</i><br/>(2013)</b>            | U | H | L | H | L | L | H | 7  |
| <b>Jenabi<br/>(2013)</b>                           | L | L | U | H | H | L | H | 7  |
| <b>Panahi <i>et al.</i><br/>(2012)</b>             | H | H | H | H | L | H | L | 4  |
| <b>Paritakul <i>et al.</i><br/>(2016)</b>          | L | L | L | L | L | L | L | 14 |
| <b>Hu <i>et al.</i><br/>(2011)</b>                 | U | H | L | H | L | L | L | 9  |
| <b>Mashak <i>et al.</i><br/>(2018)</b>             | U | L | H | H | L | L | L | 9  |
| <b>Mozaffari-Khosravi <i>et al.</i><br/>(2014)</b> | L | H | L | H | L | H | L | 8  |
| <b>Jiang <i>et al.</i><br/>(2013)</b>              | L | L | L | L | L | L | L | 14 |

---

|                                                          |   |   |   |   |   |   |   |    |
|----------------------------------------------------------|---|---|---|---|---|---|---|----|
| <b>Mozaffari-Khosravi <i>et al.</i></b><br><b>(2016)</b> | L | H | L | L | L | L | L | 12 |
| <b>Aryaeian <i>et al.</i></b><br><b>(2019)</b>           | L | L | L | L | L | L | U | 13 |
| <b>Jiang <i>et al.</i></b><br><b>(2004)</b>              | U | H | H | H | L | L | H | 5  |
| <b>Shirvani <i>et al.</i></b><br><b>(2014)</b>           | U | H | U | H | L | H | L | 6  |
| <b>Rahnama <i>et al.</i></b><br><b>(2012)</b>            | L | L | L | L | L | L | L | 14 |
| <b>Attari <i>et al.</i></b><br><b>(2015)</b>             | L | L | L | H | L | L | L | 12 |
| <b>Apariman <i>et al.</i></b><br><b>(2006)</b>           | L | H | U | H | L | L | L | 9  |
| <b>Mahluji <i>et al.</i></b><br><b>(2013)</b>            | U | L | L | L | L | L | U | 12 |
| <b>Ozgoli <i>et al.</i></b><br><b>(2009)</b>             | U | H | L | H | L | L | L | 9  |
| <b>Wu <i>et al.</i></b><br><b>(2007)</b>                 | U | H | L | H | L | L | U | 8  |
| <b>Lien <i>et al.</i></b><br><b>(2002)</b>               | U | H | L | H | L | L | H | 7  |
| <b>Imani <i>et al.</i></b><br><b>(2014)</b>              | L | H | L | H | L | L | H | 8  |
| <b>Tabibi <i>et al.</i></b><br><b>(2015)</b>             | L | H | L | H | L | L | H | 8  |
| <b>Rouhi <i>et al.</i></b><br><b>(2006)</b>              | U | H | U | H | L | L | H | 6  |

---

|                                              |   |   |   |   |   |   |   |    |
|----------------------------------------------|---|---|---|---|---|---|---|----|
| <b>Citronberg <i>et al.</i><br/>(2013)</b>   | L | H | L | L | L | L | L | 12 |
| <b>Matsumura <i>et al.</i><br/>(2015)</b>    | L | H | L | U | U | L | L | 10 |
| <b>Wigler <i>et al.</i><br/>(2003)</b>       | L | L | L | L | L | L | L | 14 |
| <b>Paramdeep<br/>(2013)</b>                  | U | H | H | H | L | L | H | 5  |
| <b>Thamlikitkul <i>et al.</i><br/>(2016)</b> | L | H | L | L | L | L | U | 11 |
| <b>Li <i>et al.</i><br/>(2017)</b>           | L | L | L | L | L | L | L | 14 |
| <b>Ansari <i>et al.</i><br/>(2016)</b>       | U | U | L | L | L | L | H | 10 |
| <b>Nanthakomon <i>et al.</i><br/>(2006)</b>  | U | U | L | H | L | L | H | 8  |
| <b>Kalava <i>et al.</i><br/>(2013)</b>       | U | H | L | H | L | L | L | 9  |
| <b>Visalyaputra <i>et al.</i><br/>(1997)</b> | U | H | L | L | L | L | H | 9  |
| <b>Phillips <i>et al.</i><br/>(1993)</b>     | U | H | L | H | L | L | H | 7  |
| <b>Ryan <i>et al.</i><br/>(2012)</b>         | L | H | L | H | L | L | L | 10 |
| <b>Black <i>et al.</i><br/>(2009)</b>        | L | H | L | L | L | L | H | 10 |

---

|                                               |   |   |   |   |   |   |   |    |
|-----------------------------------------------|---|---|---|---|---|---|---|----|
| <b>Sontakke <i>et al.</i><br/>(2002)</b>      | U | H | L | H | L | L | H | 7  |
| <b>Mansour <i>et al.</i><br/>(2012)</b>       | U | H | H | H | L | L | L | 7  |
| <b>Eberhart <i>et al.</i><br/>(2003)</b>      | L | L | L | L | L | L | H | 12 |
| <b>Shariatpanahi <i>et al.</i><br/>(2009)</b> | U | H | L | H | L | L | H | 7  |
| <b>Vutyavanich <i>et al.</i><br/>(2001)</b>   | U | L | L | H | L | L | U | 10 |
| <b>Dabaghzadeh <i>et al.</i><br/>(2014)</b>   | U | H | L | H | L | L | L | 9  |
| <b>Emrani <i>et al.</i><br/>(2016)</b>        | U | H | L | H | L | L | L | 9  |
| <b>Bossi <i>et al.</i> (2017)</b>             | L | H | L | H | L | H | H | 6  |
| <b>Gonlachavit <i>et al.</i><br/>(2003)</b>   | U | H | L | H | L | L | H | 7  |
| <b>Grontved <i>et al.</i><br/>(1988)</b>      | U | L | L | H | L | L | H | 9  |
| <b>Bone <i>et al.</i><br/>(1990)</b>          | U | H | L | H | L | H | H | 5  |
| <b>Keating <i>et al.</i><br/>(2002)</b>       | L | H | L | H | L | L | U | 9  |

---

---

|                                                   |   |   |   |   |   |   |   |    |
|---------------------------------------------------|---|---|---|---|---|---|---|----|
| <b>Fischer-Rasmussen <i>et al.</i><br/>(1990)</b> | U | L | L | L | L | L | H | 11 |
| <b>Drozdov <i>et al.</i><br/>(2012)</b>           | L | H | U | H | L | L | H | 7  |
| <b>Alizadeh-Navaei <i>et al.</i><br/>(2008)</b>   | U | H | L | H | L | L | U | 8  |
| <b>Tilburg <i>et al.</i><br/>(2014)</b>           | L | L | L | H | L | L | L | 12 |
| <b>Atashak <i>et al.</i><br/>(2011)</b>           | U | H | L | H | L | L | H | 7  |
| <b>Miyamoto <i>et al.</i><br/>(2015)</b>          | U | H | U | H | L | L | H | 6  |
| <b>Arslan <i>et al.</i><br/>(2014)</b>            | L | H | H | H | L | L | H | 6  |
| <b>Konmun <i>et al.</i><br/>(2017)</b>            | U | H | L | H | L | L | H | 7  |
| <b>Zick <i>et al.</i><br/>(2011)</b>              | L | L | L | L | L | L | H | 12 |
| <b>Zick <i>et al.</i><br/>(2008)</b>              | L | L | L | L | L | L | L | 14 |
| <b>Suzanna <i>et al.</i><br/>(2014)</b>           | L | L | L | H | L | L | L | 12 |
| <b>Tavlan <i>et al.</i><br/>(2006)</b>            | L | U | L | H | L | L | H | 9  |

---

|                                                   |   |   |   |   |   |   |   |    |
|---------------------------------------------------|---|---|---|---|---|---|---|----|
| <b>Pongroj paw <i>et al.</i></b><br><b>(2007)</b> | U | H | L | H | L | L | H | 7  |
| <b>Smith <i>et al.</i></b><br><b>(2004)</b>       | L | U | L | L | L | L | H | 11 |
| <b>Bliddal <i>et al.</i></b><br><b>(2000)</b>     | U | H | L | L | L | L | H | 9  |
| <b>Shirvani <i>et al.</i></b><br><b>(2017)</b>    | L | H | U | H | L | L | L | 9  |
| <b>Grontved <i>et al.</i></b><br><b>(1985)</b>    | U | H | L | H | U | L | H | 6  |
| <b>Phillips <i>et al.</i></b><br><b>(1992)</b>    | L | L | L | H | L | L | H | 10 |
| <b>Hasanvand <i>et al.</i></b><br><b>(2018)</b>   | U | H | L | H | L | L | H | 7  |
| <b>Biswas <i>et al.</i></b><br><b>(2011)</b>      | L | L | L | H | L | L | L | 12 |
| <b>Saberi <i>et al.</i></b><br><b>(2009)</b>      | L | H | U | H | L | L | U | 8  |
| <b>Andallu <i>et al.</i></b><br><b>(2001)</b>     | H | H | U | H | U | L | H | 4  |
| <b>Karimi <i>et al.</i></b><br><b>(2015)</b>      | U | H | U | H | L | L | H | 6  |
| <b>Firouzbakht <i>et al.</i></b><br><b>(2014)</b> | L | L | L | H | L | L | H | 10 |
| <b>Javadi <i>et al.</i></b><br><b>(2013)</b>      | U | H | U | H | H | L | H | 4  |

|                                           |   |   |   |   |   |   |   |    |
|-------------------------------------------|---|---|---|---|---|---|---|----|
| <b>Fahimi <i>et al.</i><br/>(2010)</b>    | U | U | L | H | L | L | L | 10 |
| <b>Mandal <i>et al.</i><br/>(2014)</b>    | L | U | L | H | L | L | L | 11 |
| <b>Zeraati <i>et al.</i><br/>(2016)</b>   | U | H | L | H | L | L | H | 7  |
| <b>Mowrey <i>et al.</i><br/>(1982)</b>    | U | U | U | H | L | L | H | 7  |
| <b>Stewart <i>et al.</i><br/>(1990)</b>   | L | H | U | H | H | L | H | 5  |
| <b>Yekta <i>et al.</i><br/>(2012)</b>     | L | U | L | L | L | L | L | 13 |
| <b>Arzati <i>et al.</i><br/>(2017)</b>    | U | U | L | H | L | L | L | 10 |
| <b>Khandouzi <i>et al.</i><br/>(2013)</b> | L | L | L | H | L | L | L | 12 |

H: High risk of bias; L: Low risk of bias; U: Unclear risk of bias
